# Supplementary material
Source: PubMed Central journal article supplement (PMC2886809)
Supplement: NIHMS207360-supplement-1_si_001.pdf [file NIHMS207360-supplement-1_si_001.pdf]

## Supporting Information

# Zirconium(IV)- and Hafnium(IV)-Catalyzed Highly Enantioselective Epoxidation of Homoallylic and Bishomoallylic Alcohols

Zhi Li, and Hisashi Yamamoto\*

Department of Chemistry, The University of Chicago

5735 South Ellis Avenue, Chicago, IL 60637

### General

Infrared (IR) spectra were recorded on a Nicolet 20 SXB FTIR. <sup>1</sup>H NMR spectra were recorded on Bruker DMX Model 500 (500 MHz) spectrometers. Chemical shift values ( $\delta$ ) are expressed in ppm downfield relative to internal standard (tetramethylsilane at 0 ppm). Multiplicities are indicated as s (singlet), d (doublet), t (triplet), q (quartet), m (multiplet) and br (broad). <sup>13</sup>C NMR spectra were recorded on a Bruker DMX Model 500 (125 MHz) spectrometer and are expressed in ppm using solvent as the internal standard (CDCl<sub>3</sub> at 77.0 ppm). Analytical gas-liquid chromatography (GLC) was performed on a Shimadzu GC-17A instrument equipped with a flame ionization detector and capillary columns of  $\beta$ -TA (0.25mm  $\times$  20m),  $\gamma$ -TA (0.25mm  $\times$  20m),  $\beta$ -DM (0.25mm  $\times$  20m) and  $\beta$ -DP (0.25mm  $\times$  20m) from Chiraldex using nitrogen as carrier gas. High-performance liquid chromatography (HPLC) was performed on a Varian ProStar Series equipped with a variable wavelength detector using chiral stationary columns (Chiracel AD-H, OB-H or OD-H, 0.46 cm  $\times$  25 cm) from Daicel. Optical rotations were measured on a JASCO DIP-1000 digital polarimeter. High-resolution electro spray ionization (HRMS-ESI) mass spectra were obtained from the Mass Spectrometry Lab of University of Illinois at Urbana-Champaign.

All reactions were carried out in flame-dried glassware with nitrogen atmosphere and magnetic stirring unless otherwise noted. Analytical thin-layer chromatography (TLC) was performed on Merck pre-coated TLC plates (silica gel 60 GF254, 0.25 mm). Flash chromatography was performed on silica gel E. Merck 9385 or silica gel 60 extra pure (for all the bis-hydroxamic acids). Dichloromethane (CH<sub>2</sub>Cl<sub>2</sub>) and toluene (PhCH<sub>3</sub>) were purchased from J.T.Baker as Low water and purified with MBRAUN MB-SPS Solvent Purifier System prior to use. Zr(O*t*Bu)<sub>4</sub> and Hf(O*t*Bu)<sub>4</sub> were purchased from Strem and stored and handled in the glove box. Powdered molecular sieves were purchased from Sigma-Aldrich and activated with microwave oven. 1,3-Dimethyl-3,4,5,6-tetrahydro-2(1H)-pyrimidinone (DMPU) was purchased from Sigma-Aldrich and distilled from CaH<sub>2</sub> prior to use. Homoallylic alcohols and products in Tables 1 and 2 have been previously isolated and characterized. References can be found elsewhere. All other reagents and starting materials, unless otherwise noted, were purchased from commercial vendors and used without further purification.

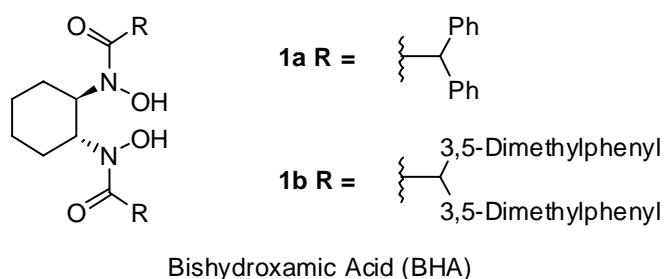

**Preparation of Ligands 1a and 1b:** Refer to previous reports of our group.<sup>1-3</sup> They are commercially available in both enantiomer forms.

### Preparation of substrates

Substrates **2a**, **2b**, **2g**, **2h**, **2i** and **4h** were purchased from commercial vendors and stored on 4Å molecular sieves pellets after received. Substrates **2c**,<sup>4</sup> **2d**,<sup>5</sup> **2e**,<sup>4</sup> **2f**,<sup>6</sup> **2j**,<sup>5</sup> **4a-4c**,<sup>7</sup> **4d**,<sup>8,9</sup> **4e-4g**<sup>7</sup> were synthesized according to reported procedures.

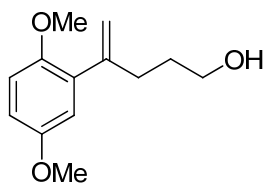

**4-(2,5-dimethoxyphenyl)pent-4-en-1-ol (4e):** Yield 54%.  $^1\text{H}$  NMR (500 MHz,  $\text{CDCl}_3$ ):  $\delta$  6.82-6.70 (m, 3 H), 5.17 (d,  $J = 1$  Hz, 1 H), 5.05 (d,  $J = 1.5$  Hz, 1 H), 3.77 (s, 6 H), 3.64 (m, 2 H), 2.56 (t,  $J = 7.5$  Hz, 2 H), 1.64 (m, 2 H), 1.50 (br, 1 H);  $^{13}\text{C}$  NMR (125 MHz,  $\text{CDCl}_3$ ):  $\delta$  153.5, 150.7, 148.0, 132.9, 116.3, 114.7, 112.4, 111.9, 62.5, 56.2, 55.7, 32.5, 31.0;  $[\text{M}+\text{H}]^+$ :  $\text{C}_{13}\text{H}_{19}\text{O}_3^+$ , calc. 223.1334, found 223.1330.

**General procedure for asymmetric epoxidation of homoallylic alcohols.**

$[\text{Zr}(\text{O}t\text{Bu})_4]$  (4.0  $\mu\text{L}$ , 0.0100 mmol) or  $[\text{Hf}(\text{O}t\text{Bu})_4]$  (4.0  $\mu\text{L}$ , 0.0099 mmol) was added to a mixture of **1a** (5.4 mg, 0.0101 mmol), DMPU (2.6mg, 0.0203mmol), and 4Å molecular sieves powder (100mg) in toluene (0.5 mL). The catalyst mixture was stirred for 1h at RT. The resulting solution was cooled to 0 °C, and 3-methyl-3-buten-1-ol (**2a**) (43.0 mg, 0.50 mmol) and 80% cumene hydroperoxide (0.13 mL, 0.75 mmol) were added sequentially. The mixture was stirred at 0 °C for 4 h, then warmed to RT, and stirred for the next 36 hr. Methanol was then added, and the reaction mixture was stirred for 10 min at RT. The mixture was purified by flash column chromatography on silica gel to provide the epoxy alcohol **3a** (81%, 97% ee). A solution of 50% ethyl ether in pentane was used as chromatography eluent. Evaporation of solvents should be carefully carried out under 0 °C because **3a** is a volatile liquid. The same measures were performed in purification of **3b**. In all other cases, different ration of hexanes and ethyl acetate mixture solutions were used as eluents.

**General procedure for asymmetric epoxidation of bishomoallylic alcohols.**

$[\text{Zr}(\text{O}t\text{Bu})_4]$  (4.0  $\mu\text{L}$ , 0.0100 mmol) or  $[\text{Hf}(\text{O}t\text{Bu})_4]$  (4.0  $\mu\text{L}$ , 0.0099 mmol) was added to a mixture of **1a** (5.4 mg, 0.0101 mmol), DMPU (2.6mg, 0.0203mmol), and corresponding molecular sieves powder (100mg) in toluene (0.5 mL). The catalyst mixture was stirred for 1h at RT. 4-phenyl-4-penten-1-ol (**4a**) (16.2 mg, 0.10 mmol) and 80% cumene hydroperoxide (0.025 mL, 0.15 mmol) were added sequentially. The mixture was stirred at RT for 48 h. Methanol was then added, and the reaction mixture was stirred for 10 min. The mixture was purified by flash column chromatography on silica gel with 1% triethylamine in 5:1 hexanes/ethyl acetate solution to provide the epoxy alcohol **5a** (75%, 99% ee). A solution of 15% ethyl ether in pentane was used as chromatography eluent when purifying **6h**. Evaporation of solvents should be carefully carried out under 0 °C because it is a volatile liquid.

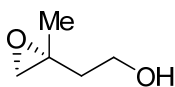

**(R)-2-(2-methyloxiran-2-yl)ethanol (3a):** Reaction time 40 hr, yield 61% ee 91% with Zr-BHA, yield 81% ee 97% with Hf-BHA;  $^1\text{H NMR}$  (500 MHz,  $\text{CDCl}_3$ ):  $\delta$  3.79-3.67 (m, 2 H), 2.83 (d,  $J = 4.5$  Hz, 1 H), 2.65 (d,  $J = 4.5$  Hz, 1 H), 2.12 (m, 1 H), 2.00-1.94 (m, 1 H), 1.90-1.84 (m, 1 H), 1.39 (s, 3 H); It is consistent with literature value.<sup>1</sup> Optical rotation:  $[\alpha]_{\text{D}}^{23} -7.9^\circ$  ( $c$  0.92,  $\text{CHCl}_3$ ) (97% ee); Chiral GC (Chiraldex  $\gamma$ -TA): Condition: injection temperature 100  $^\circ\text{C}$ , column temp. = 70 $^\circ\text{C}$ , injection pressure = 100 kpa, detector temperature 250  $^\circ\text{C}$ ; result: 8.0min (major), 10.0min (minor).

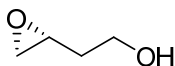

**(R)-2-(oxiran-2-yl)ethanol (3b):** Reaction time 40 hr, yield 37% ee 63% with Hf-BHA;  $^1\text{H NMR}$  (500 MHz,  $\text{CDCl}_3$ ):  $\delta$  3.81 (t,  $J = 6.0$  Hz, 2 H), 3.13-3.10 (m, 1 H), 2.82 (t,  $J = 4.5$  Hz, 1 H), 2.60 (m, 1 H), 2.02-1.97 (m, 1  $\text{CH}_2$  and 1  $\text{OH}$ ), 1.73-1.70 (m, 1 H); It is consistent with literature value.<sup>10</sup> Optical rotation:  $[\alpha]_{\text{D}}^{24} +4.2^\circ$  ( $c$  0.74,  $\text{CHCl}_3$ ) (63% ee);<sup>11</sup> Chiral GC (Chiraldex  $\gamma$ -TA): Condition: injection temperature 100  $^\circ\text{C}$ , column temp. = 70  $^\circ\text{C}$ , injection pressure = 100 kpa, detector temperature 250  $^\circ\text{C}$ ; result: 6.5 min (major), 7.3 min (minor).

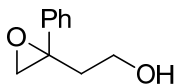

**2-(2-phenyloxiran-2-yl)ethanol (3c):** Reaction time 40 hr, yield 67% ee 92% with Zr-BHA, yield 69% ee 98% with Hf-BHA;  $^1\text{H NMR}$  (500 MHz,  $\text{CDCl}_3$ ):  $\delta$  7.40-7.28 (m, 5 H), 3.78-3.70 (m, 2 H), 3.13 (d,  $J = 5.0$  Hz, 2 H), 2.78 (d,  $J = 5.0$  Hz, 1 H), 2.54-2.48 (m, 1 H), 2.15-2.09 (m, 1 H), 2.00 (t,  $J = 5.5$  Hz, 1 H); It is consistent with literature value.<sup>12</sup> Optical rotation:  $[\alpha]_{\text{D}}^{27} +12.2^\circ$  ( $c$  0.67,  $\text{CHCl}_3$ ) (92% ee); Chiral HPLC (Chiracel AD-H): Condition: 95:5 Hexanes/2-Propanol, flow rate 1.0mL/min; result: 13.9 min (minor), 14.7 min (major).

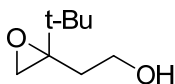

**2-(2-tert-butyloxiran-2-yl)ethanol(3d):** Reaction time 40 hr, yield 67% ee 63% with Zr-BHA, yield 70% ee 71% with Hf-BHA;  $^1\text{H NMR}$  (500 MHz,  $\text{CDCl}_3$ ):  $\delta$  3.60-3.55 (m, 2 H), 2.88 (d,  $J = 3.8$  Hz, 1 H), 2.83 (d,  $J = 3.8$  Hz, 1 H), 2.55-2.52 (m, 1 H), 2.27-2.20 (m,

1 H), 1.97-1.91 (m, 1 H), 0.95 (s, 9 H).  $^{13}\text{C}$  NMR (125 MHz,  $\text{CDCl}_3$ ):  $\delta$  64.0, 58.8, 48.3, 33.8, 30.2, 25.6;  $[\text{M}+\text{Na}]^+$ :  $\text{C}_8\text{H}_{16}\text{O}_2\text{Na}$ , calc. 167.1048, found 167.1044; Optical rotation:  $[\alpha]_{\text{D}}^{27} +20.6^\circ$  ( $c$  0.88,  $\text{CHCl}_3$ ) (71% ee); Chiral GC (Chiraldex  $\beta$ -DP): Condition: injection temperature 120  $^\circ\text{C}$ , column temperature 90  $^\circ\text{C}$ , column pressure 100 kPa, detector temperature 250  $^\circ\text{C}$ ; result: 16.3 min (major), 17.9 min (minor).

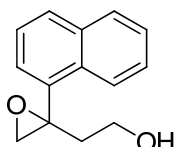

**2-(2-(naphthalen-1-yl)oxiran-2-yl)ethanol(3e)**: Reaction time 40 hr, yield 31%, ee 91% with Hf-BHA;  $^1\text{H}$  NMR (500 MHz,  $\text{CDCl}_3$ ):  $\delta$  8.11 (d,  $J = 7.1$  Hz, 1 H), 7.88 (d,  $J = 7.5$  Hz, 1H), 7.82 (d,  $J = 8.2$  Hz, 1 H), 7.60-7.44 (m, 4 H), 3.77-3.65 (m, 2 H), 3.33 (d,  $J = 5.0$  Hz, 1 H), 2.98 (d,  $J = 5.0$  Hz, 1 H), 2.46-2.41 (m, 1 H), 2.30-2.24 (m, 1 H), 2.15 (br, 1H). It is consistent with literature value.<sup>13</sup> Chiral HPLC (Chiracel AD-H): Condition: 95:5 Hexanes/2-Propanol, flow rate 0.5mL/min; result: 36.2 min (major), 37.9 min (minor).

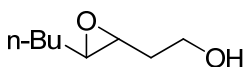

**2-(3-butylloxiran-2-yl)ethanol(3f)**: Reaction time 40 hr, yield 47% ee 73% with Hf-BHA;  $^1\text{H}$  NMR (500 MHz,  $\text{CDCl}_3$ ):  $\delta$  3.81-3.75 (m, 2 H), 2.88-2.85 (m, 1 H), 2.82-2.79 (m, 1 H), 2.03-1.96 (m, 1 H), 1.85 (br, 1 H), 1.75-1.65 (m, 1 H), 1.57-1.52 (m, 2 H), 1.45-1.34 (m, 4 H), 0.92 (t,  $J = 7.1$  Hz, 3 H).  $^{13}\text{C}$  NMR (125 MHz,  $\text{CDCl}_3$ ):  $\delta$  60.1, 58.2, 56.9, 34.1, 31.6, 28.1, 22.5, 14.0;  $[\text{M}+\text{Na}]^+$ :  $\text{C}_8\text{H}_{16}\text{O}_2\text{Na}$ , calc. 167.1048, found 167.1048; Optical rotation:  $[\alpha]_{\text{D}}^{26} +30.8^\circ$  ( $c$  0.66,  $\text{CHCl}_3$ ) (71% ee); Chiral GC (Chiraldex  $\beta$ -DP): Condition: injection temperature 120  $^\circ\text{C}$ , column temperature 80  $^\circ\text{C}$  for 60 min, and then heat to 100  $^\circ\text{C}$  on the rate of 2  $^\circ\text{C}/\text{min}$ , column pressure 100 kPa, detector temperature 250  $^\circ\text{C}$ ; result: 81.9 min (minor), 82.9 min (major).

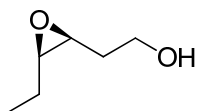

**2-((2S,3R)-3-ethyloxiran-2-yl)ethanol(3g)**: Reaction time 40 hr, yield 45%, ee 93% with Zr-BHA, yield 82% ee 94% with Hf-BHA;  $^1\text{H}$  NMR (500 MHz,  $\text{CDCl}_3$ ):  $\delta$  3.91-3.85 (m, 2 H), 3.13-3.10 (m, 1 H), 2.95-2.92 (m, 1 H), 1.92-1.86 (m, 1 H), 1.76-1.66 (m, 2 H (including 1 OH)), 1.65-1.49 (m, 2 H), 1.06 (t,  $J = 7.5$  Hz, 3 H); It is consistent with literature value.<sup>2</sup> Optical rotation:  $[\alpha]_{\text{D}}^{25} -28.3^\circ$  ( $c$  0.90,  $\text{CHCl}_3$ ) (93% ee);<sup>11</sup> Chiral GC

(Chiraldex  $\gamma$ -TA)<sup>2</sup>: Condition: injection temperature 120 °C, column temperature 90 °C, column pressure 100 kPa, detector temperature 250 °C; result: 7.8 min (major), 8.8 min (minor).

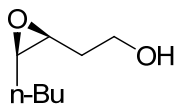

**2-((2*S*,3*R*)-3-butyloxiran-2-yl)ethanol(3h)**: Reaction time 40 hr, yield 80% ee 92% with Zr-BHA, yield 83% ee 96% with Hf-BHA; <sup>1</sup>H NMR (500 MHz, CDCl<sub>3</sub>):  $\delta$  3.92-3.84 (m, 2 H), 3.12-3.09 (m, 1 H), 2.97-2.94 (m, 1 H), 1.94-1.86 (m, 1 H), 1.79 (br, 1 H), 1.76-1.67 (m, 1 H), 1.60-1.36 (m, 6 H), 0.93 (t,  $J = 6.5$  Hz, 3 H); It is consistent with literature value.<sup>2</sup> Optical rotation:  $[\alpha]_D^{25} -19.7^\circ$  ( $c$  0.74, CHCl<sub>3</sub>) (95% ee); Chiral GC (Chiraldex  $\gamma$ -TA): Condition: injection temperature 120 °C, column temperature 80 °C, column pressure 100 kPa, detector temperature 250 °C; result: 44.6 min (major), 50.0 min (minor).

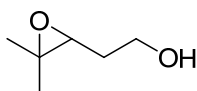

**2-(3,3-dimethyloxiran-2-yl)ethanol(3i)**: Reaction time 40 hr, yield 41% ee 71% with Hf-BHA; <sup>1</sup>H NMR (500 MHz, CDCl<sub>3</sub>):  $\delta$  3.91-3.82 (m, 2 H), 2.93-2.90 (m, 1 H), 1.96-1.87 (m, 1 H), 1.79-1.69 (m, 2 H (including 1 OH)), 1.34 (s, 3 H), 1.30 (s, 3 H); It is consistent with literature value.<sup>10</sup> Chiral GC (Chiraldex  $\gamma$ -TA)<sup>13</sup>: Condition: injection temperature 100 °C, column temperature 70 °C, column pressure 100 kPa, detector temperature 250 °C; result: 17.0 min (major), 19.6 min (minor).

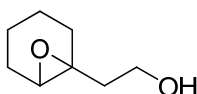

**2-(7-oxabicyclo[4.1.0]heptan-1-yl)ethanol(3j)**: Reaction time 40 hr, yield 72% ee 76% with Zr-BHA, yield 81% ee 89% with Hf-BHA; <sup>1</sup>H NMR (500 MHz, CDCl<sub>3</sub>):  $\delta$  3.77-3.70 (m, 2 H), 3.19 (d,  $J = 3.0$  Hz, 1 H), 2.32-2.30 (m, 1 H), 2.03-1.69 (m, 6 H), 1.50-1.39 (m, 2 H), 1.35-1.19 (m, 2 H); It is consistent with literature value.<sup>14</sup> Optical rotation:  $[\alpha]_D^{26} +23.7^\circ$  ( $c$  0.95, CHCl<sub>3</sub>) (87% ee); Chiral GC (Chiraldex  $\beta$ -DP): Condition: injection temperature 130 °C, column temperature 110 °C, column pressure 100 kPa, detector temperature 250 °C; result: 21.7 min (minor), 22.4 min (major).

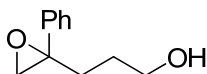

**3-(2-phenyloxiran-2-yl)propan-1-ol(5a):** Reaction time 48 hr. Yield 75%;  $^1\text{H}$  NMR (500 MHz,  $\text{CDCl}_3$ ):  $\delta$  7.40-7.26 (m, 5 H), 3.67-3.63 (m, 2 H), 3.01 (d,  $J = 5.0$  Hz, 1 H), 2.76 (d,  $J = 5.5$  Hz, 1 H), 2.45-2.40 (m, 1 H), 1.80-1.74 (m, 1 H), 1.68-1.63 (m, 3 H (including 1 OH)); It is consistent with literature value.<sup>15</sup> 99% e.e., Optical rotation:  $[\alpha]_{\text{D}}^{28} -3.4^\circ$  (c 0.68,  $\text{CHCl}_3$ ) (97% ee); Chiral HPLC (Chiracel OB-H): Condition: 95:5 Hexanes/2-Propanol, flow rate 1.0 mL/min; result: 15.6 min (major), 26.6 min (minor).

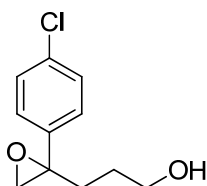

**3-(2-(4-chlorophenyl)oxiran-2-yl)propan-1-ol(5b):** Reaction time 48 hr. Yield 57%;  $^1\text{H}$  NMR (500 MHz,  $\text{CDCl}_3$ ):  $\delta$  7.31 (apparent singlet, 4 H), 3.65-3.61 (m, 2 H), 3.00 (d,  $J = 5.0$  Hz, 1 H), 2.72 (d,  $J = 5.0$  Hz, 1 H), 2.43-2.36 (m, 1 H), 1.79-1.72 (m, 2 H (including 1 OH)), 1.66-1.59 (m, 2 H);  $^{13}\text{C}$  NMR (125 MHz,  $\text{CDCl}_3$ ):  $\delta$  138.1, 133.3, 128.6, 127.3, 62.2, 59.7, 56.1, 31.5, 27.7;  $[\text{M}+\text{Na}]^+$ :  $\text{C}_{11}\text{H}_{13}\text{ClO}_2\text{Na}$ , calc. 235.0502, found 235.0498; 97% e.e.; Chiral HPLC (Chiracel OB-H): Condition: 99:1 Hexanes/2-Propanol, flow rate 1.0 mL/min; result: 59.9 min (minor), 64.9 min (major).

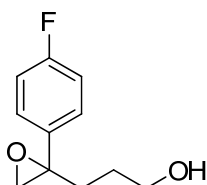

**3-(2-(4-fluorophenyl)oxiran-2-yl)propan-1-ol(5c):** Reaction time 48 hr. Yield 73%;  $^1\text{H}$  NMR (500 MHz,  $\text{CDCl}_3$ ):  $\delta$  7.36-7.33 (m, 2 H), 7.05-7.00 (m, 2 H), 3.64 (t,  $J = 6.3$  Hz, 2 H), 3.00 (d,  $J = 5.5$  Hz, 1 H), 2.73 (d,  $J = 5.0$  Hz, 1 H), 2.42-2.35 (m, 1 H), 1.80-1.73 (m, 1 H), 1.66-1.57 (m, 3 H (including 1 OH));  $^{13}\text{C}$  NMR (125 MHz,  $\text{CDCl}_3$ ):  $\delta$  127.6, 127.6, 115.4, 115.2, 62.2, 59.7, 56.1, 31.7, 27.8;  $[\text{M}+\text{Na}]^+$ :  $\text{C}_{11}\text{H}_{13}\text{FO}_2\text{Na}$ , calc. 219.0797, found 219.0788; 97% e.e.; Chiral HPLC (Chiracel OB-H): Condition: 95:5 Hexanes/2-Propanol, flow rate 1.0 mL/min; result: 17.2 min (minor), 19.7 min (major).

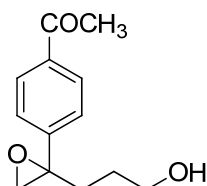

**1-(4-(2-(3-hydroxypropyl)oxiran-2-yl)phenyl)ethanone (5d):** Reaction time 48 hr.

Yield 79%;  $^1\text{H}$  NMR (500 MHz,  $\text{CDCl}_3$ ):  $\delta$  7.94-7.92 (m, 2 H), 7.48-7.45 (m, 2 H), 3.65-3.62 (m, 2 H), 3.04 (d,  $J = 5.5$  Hz, 1 H), 2.73 (d,  $J = 5.5$  Hz, 1 H), 2.59 (s, 3 H), 2.49-2.44 (m, 1 H), 1.80-1.74 (m, 1 H), 1.66-1.60 (m, 2 H (including 1 OH));  $^{13}\text{C}$  NMR (125 MHz,  $\text{CDCl}_3$ ):  $\delta$  197.6, 145.0, 136.4, 128.5, 126.0, 62.2, 59.9, 56.2, 31.3, 27.7, 26.6; 97% e.e.; Chiral HPLC (Chiracel OB-H): Condition: 95:5 Hexanes/2-Propanol, flow rate 1.0 mL/min; result: 37.3 min (major), 43.5 min (minor).

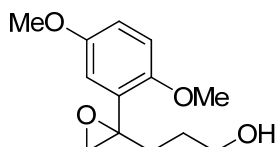

**3-(2-(2,5-dimethoxyphenyl)oxiran-2-yl)propan-1-ol(5e):** Yield 25%;  $^1\text{H}$  NMR (500 MHz,  $\text{CDCl}_3$ ):  $\delta$  6.94-6.92 (m, 1 H), 6.79-6.78 (m, 2 H), 3.81 (s, 3 H), 3.77 (s, 3 H), 3.67-3.60 (m, 2 H), 2.99 (d,  $J = 5.0$  Hz, 1 H), 2.76 (d,  $J = 5.0$  Hz, 1 H), 2.35-2.28 (m, 1 H), 1.75-1.68 (m, 1 H), 1.64-1.56 (m, 2 H);  $^{13}\text{C}$  NMR (125 MHz,  $\text{CDCl}_3$ ):  $\delta$  129.2, 127.9, 116.1, 113.9, 113.5, 111.4, 62.7, 59.2, 55.8, 55.8, 54.5, 32.0, 28.0;  $[\text{M}+\text{Na}]^+$ :  $\text{C}_{13}\text{H}_{18}\text{O}_4\text{Na}$ , calc. 261.1103, found 261.1108; 97% e.e.; Chiral HPLC (Chiracel OB-H): Condition: 95:5 Hexanes/2-Propanol, flow rate 1.0 mL/min; result: 32.7 min (minor), 36.7 min (major).

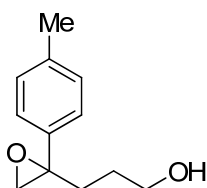

**3-(2-p-tolyloxiran-2-yl)propan-1-ol(5f):** Reaction time 48 hr. Yield 53%;  $^1\text{H}$  NMR (500 MHz,  $\text{CDCl}_3$ ):  $\delta$  7.29-7.24 (m, 2 H), 7.16-7.14 (m, 2 H), 3.65-3.61 (m, 2 H), 2.98 (d,  $J = 5.5$  Hz, 1 H), 2.74 (d,  $J = 5.5$  Hz, 1 H), 2.42-2.36 (m, 1 H), 2.34 (s, 3 H), 1.79-1.73 (m, 2 H (including 1 OH)), 1.66-1.61 (m, 2 H);  $^{13}\text{C}$  NMR (125 MHz,  $\text{CDCl}_3$ ):  $\delta$  137.2, 136.5, 129.1, 125.7, 62.3, 60.0, 56.1, 31.8, 27.9;  $[\text{M}+\text{Na}]^+$ :  $\text{C}_{12}\text{H}_{16}\text{O}_2\text{Na}$ , calc. 215.1048, found 215.1045; 97% e.e.; Chiral HPLC (Chiracel OB-H): Condition: 98:2 Hexanes/2-Propanol, flow rate 1.0 mL/min; result: 28.8 min (minor), 30.1 min (major).

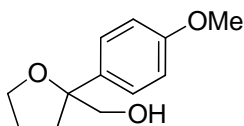

**(2-(4-methoxyphenyl)tetrahydrofuran-2-yl)methanol(6g):** Reaction time 48 hr, yield 47%;  $^1\text{H}$  NMR (500 MHz,  $\text{CDCl}_3$ ):  $\delta$  7.31-7.28 (m, 2 H), 6.90-6.86 (m, 2 H), 4.02-3.97 (m, 1 H), 3.94-3.89 (m, 1 H), 3.79 (s, 3 H), 3.65-3.57 (m, 2 H), 2.34-2.27 (m, 1 H), 2.10-2.04 (m, 1 H), 2.00-1.93 (m, 2 H (including 1 OH)), 1.88-1.81 (m, 1 H);  $^{13}\text{C}$  NMR (125



MHz, CDCl<sub>3</sub>):  $\delta$  158.6, 136.2, 126.5, 113.7, 87.0, 69.1, 68.3, 55.3, 33.9, 26.1; 59% e.e.; Chiral HPLC (Chiracel OD-H): Condition: 95:5 Hexanes/2-Propanol, flow rate 1.0 mL/min; result: 9.4 min (major), 12.1 min (minor).

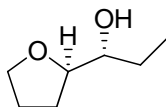

**(R)-1-((R)-tetrahydrofuran-2-yl)propan-1-ol(6h)**: Reaction time 72 hr; Yield 41%; <sup>1</sup>H NMR (500 MHz, CDCl<sub>3</sub>):  $\delta$  3.86-3.73 (m, 3 H), 3.35-3.30 (m, 1 H), 2.18 (br, 1 H), 1.97-1.89 (m, 3 H), 1.67-1.60 (m, 1 H), 1.57-1.41 (m, 2 H), 1.01 (t, 3 H,  $J = 7.5$  Hz); It is consistent with literature value.<sup>16</sup> 95% e.e.; Chiral GC (Chiraldex  $\gamma$ -TA): Condition: injection temperature 100 °C, column temp. = 60 °C, injection pressure = 80 kpa, detector temperature 250 °C; result: 19.5min (minor), 20.6 min (major). Retention time of diastereomer **6h'**: 20.9 min.

#### Results of non-linear effect experiment:

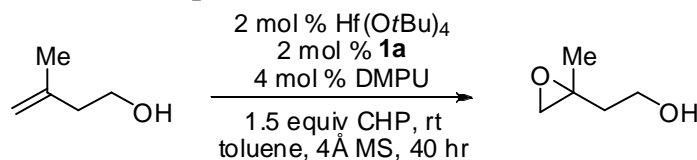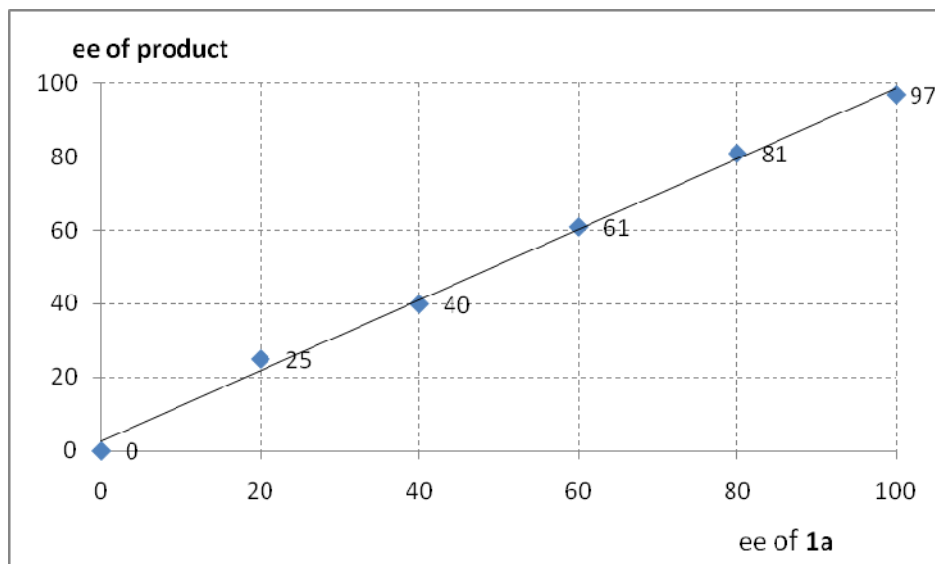

#### References

- (1) Zhang, W.; Basak, A.; Kosugi, Y.; Hoshino, Y.; Yamamoto, H., *Angew. Chem. Int. Ed.* **2005**, *44*, 4389.
- (2) Zhang, W.; Yamamoto, H., *J. Am. Chem. Soc.* **2007**, *129*, 286.

- (3) Li, Z.; Zhang, W.; Yamamoto, H., *Angew. Chem. Int. Ed.* **2008**, *47*, 7520.
- (4) Cabri, W.; Candiani, I.; Bedeschi, A.; Santi, R., *J. Org. Chem.* **1992**, *57*, 3558.
- (5) Snider, B. B.; Rodini, D. J.; Kirk, T. C.; Cordova, R., *J. Am. Chem. Soc.* **1982**, *104*, 555.
- (6) Vyvyan, J. R.; Holst, C. L.; Johnson, A. J.; Schwenk, C. M., *J. Org. Chem.* **2002**, *67*, 2263.
- (7) Takemiya, A.; Hartwig, J. F., *J. Am. Chem. Soc.* **2006**, *128*, 6042.
- (8) Harris, G. D.; Herr, R. J.; Weinreb, S. M., *J. Org. Chem.* **1993**, *58*, 5452.
- (9) Reetz, M. T.; Guo, H.; Ma, J.-A.; Goddard, R.; Mynott, R. J., *J. Am. Chem. Soc.* **2009**, *131*, 4136.
- (10) Okachi, T.; Murai, N.; Onaka, M., *Org. Lett.* **2003**, *5*, 85.
- (11) Rossiter, B. E.; Sharpless, K. B., *J. Org. Chem.* **1984**, *49*, 3707.
- (12) Wang, B.; Wong, O. A.; Zhao, M.-X.; Shi, Y., *J. Org. Chem.* **2009**, *73*, 9539.
- (13) Makita, N.; Hoshino, Y.; Yamamoto, H., *Angew. Chem. Int. Ed.* **2003**, *42*, 941.
- (14) Ferraz, H. M. C.; Luiz S. Longo, J., *J. Org. Chem.* **2007**, *72*, 2945.
- (15) Wang, B.; Wong, O. A.; Zhao, M.-X.; Shi, Y., *J. Org. Chem.* **2008**, *73*, 9539.
- (16) Ahn, Y.; Cohen, T., *J. Org. Chem.* **1994**, *59*, 3142.

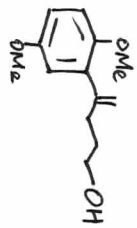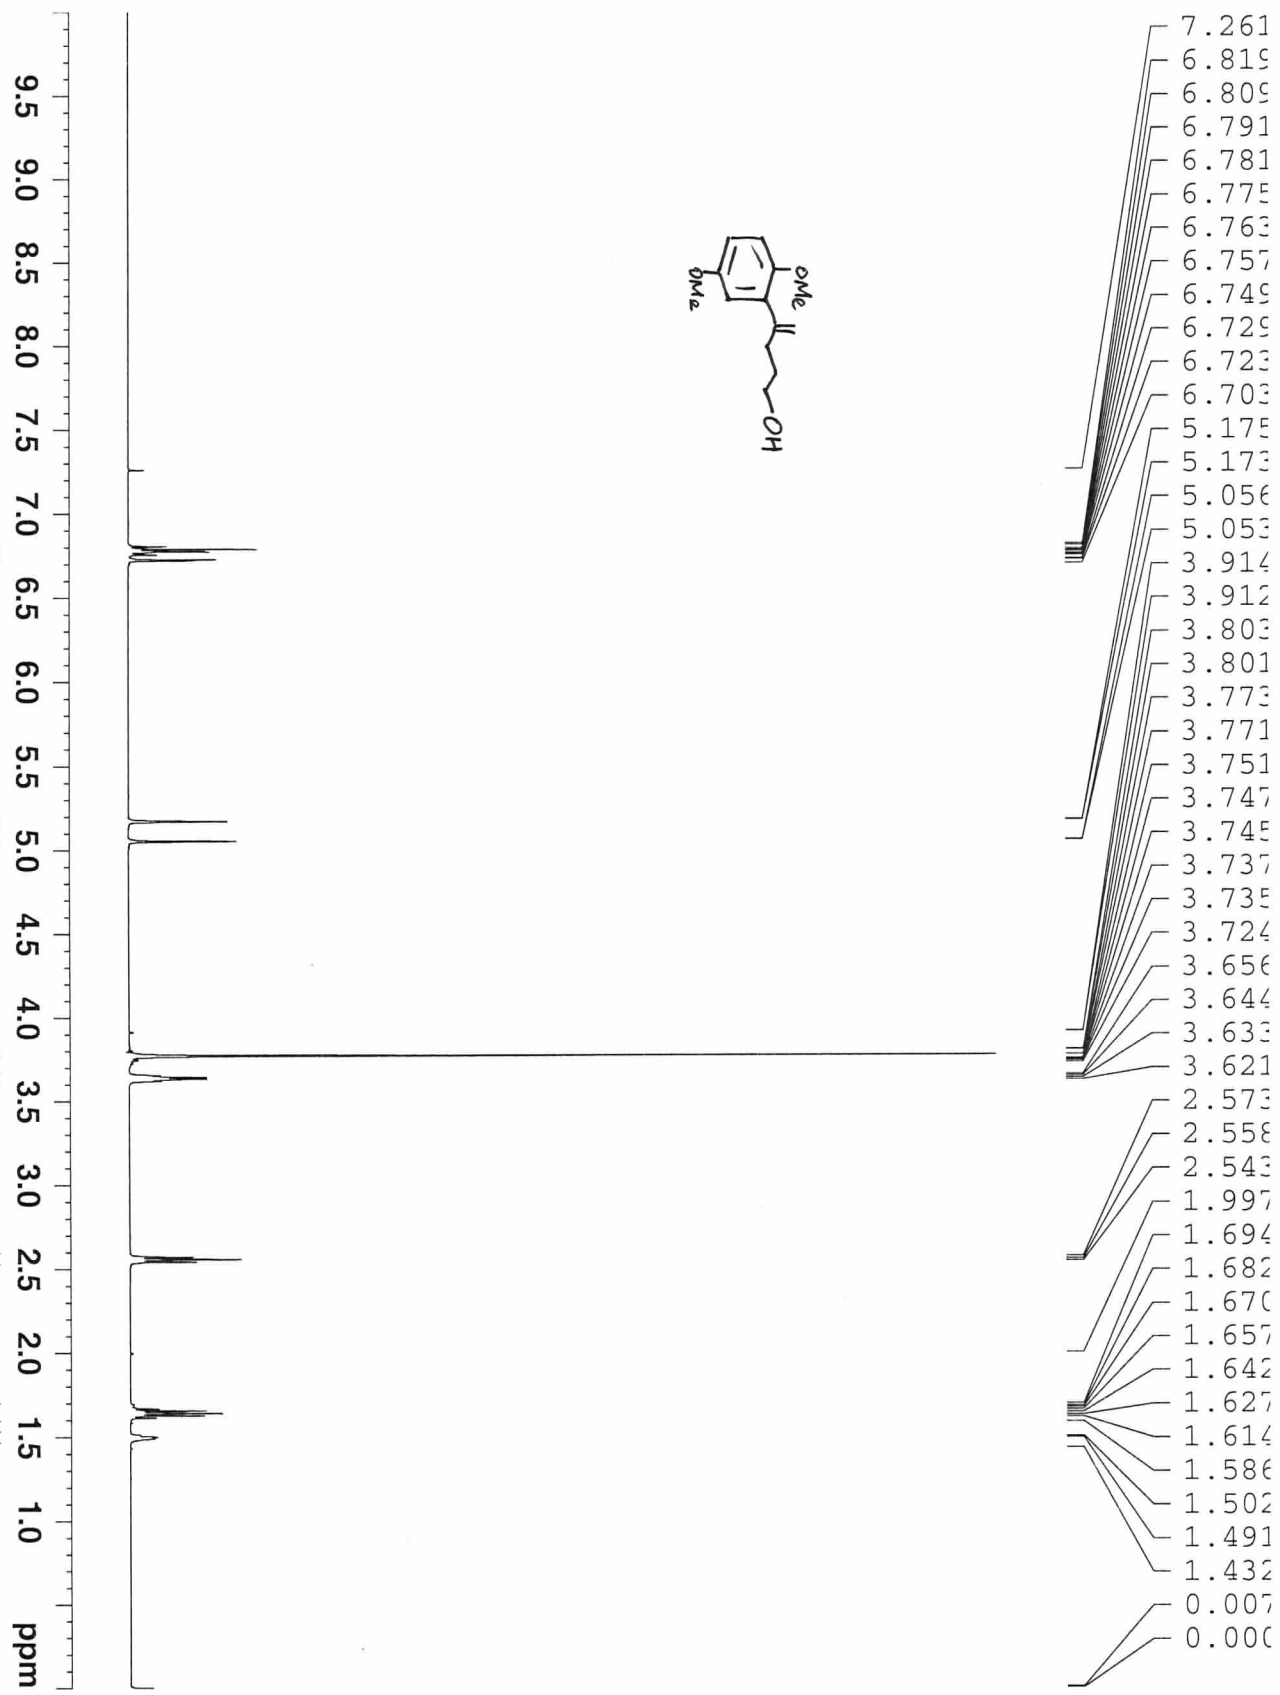

| Chemical Shift (ppm) | Integration |
|----------------------|-------------|
| 7.261                |             |
| 6.819                |             |
| 6.809                |             |
| 6.791                |             |
| 6.781                |             |
| 6.775                |             |
| 6.763                |             |
| 6.757                |             |
| 6.749                |             |
| 6.729                |             |
| 6.723                |             |
| 6.703                |             |
| 5.175                |             |
| 5.173                |             |
| 5.056                |             |
| 5.053                |             |
| 3.914                |             |
| 3.912                |             |
| 3.803                |             |
| 3.801                |             |
| 3.773                |             |
| 3.771                |             |
| 3.751                |             |
| 3.747                |             |
| 3.745                |             |
| 3.737                |             |
| 3.735                |             |
| 3.724                |             |
| 3.656                |             |
| 3.644                |             |
| 3.633                |             |
| 3.621                |             |
| 2.573                |             |
| 2.558                |             |
| 2.543                |             |
| 1.997                |             |
| 1.694                |             |
| 1.682                |             |
| 1.670                |             |
| 1.657                |             |
| 1.642                |             |
| 1.627                |             |
| 1.614                |             |
| 1.586                |             |
| 1.502                |             |
| 1.491                |             |
| 1.432                |             |
| 0.007                |             |
| 0.000                |             |

0.8295  
0.8102  
0.7288

1.0000  
0.9810

5.8149  
1.9060

1.9785

2.0243  
0.6962

```

Current Data Parameters
NAME          ZL7R316H167A
EXPNO         1
PROCNO        1

F2 - Acquisition Parameters
Date_         20100107
Time          21.18
INSTRUM      spect
PROBHD       5 mm PABBI 1H/
PULPROG      zgpg
TD            59938
SOLVENT      CDCl3
NS            6
DS            0
SWH           10000.000 Hz
FIDRES       0.166672 Hz
AQ           2.9999499 sec
RG           32
DM           50.000 us
DE           7.50 us
TE           295.0 K
D1           1.00000000 sec
TD0          1

===== CHANNEL f1 =====
NUC1          1H
P1            5.35 us
PL1           0.00 dB
SFO1         499.8729992 MHz

F2 - Processing parameters
SI            32768
SF            499.8700172 MHz
WDW           EM
SSB           0
LB            0.30 Hz
GB            0
PC            1.00
  
```

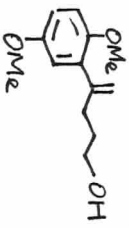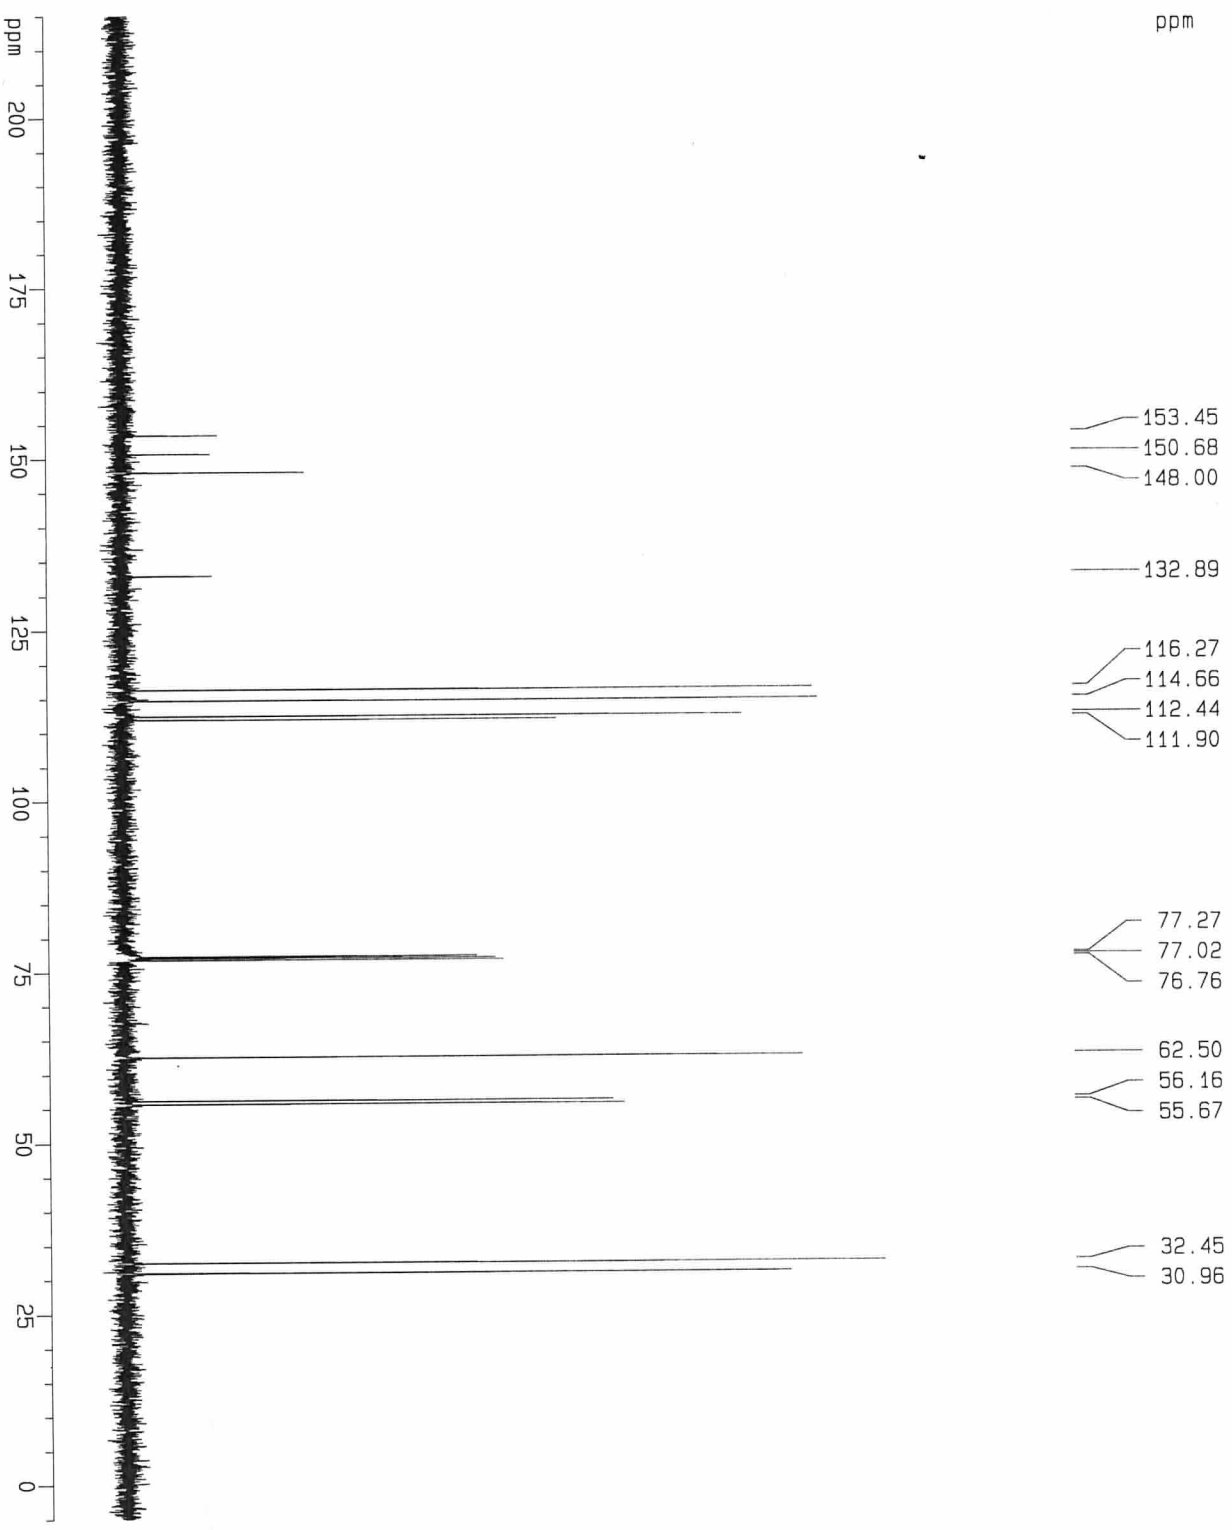

Current Data Parameters  
 NAME ZLR346C167A  
 EXPNO 1  
 PROCNO 1

F2 - Acquisition Parameters  
 Date\_ 20100108  
 Time 22.48  
 INSTRUM spect  
 PROBHD 5 mm QNP 1H  
 PULPROG zgpg30  
 TD 75184  
 SOLVENT CDCl3  
 NS 134  
 DS 0  
 SMH 37593.984 Hz  
 FIDRES 0.500026 Hz  
 AQ 0.9999972 sec  
 RG 4096  
 DW 13.300 usec  
 DE 7.50 usec  
 TE 300.0 K  
 D1 0.10000000 sec  
 d11 0.03000000 sec

===== CHANNEL f1 =====  
 NUC1 13C  
 P1 4.60 usec  
 PL1 0.00 dB  
 SF01 125.7690572 MHz

===== CHANNEL f2 =====  
 CPDPRG2 waltz16  
 NUC2 1H  
 PCPD2 90.00 usec  
 PL2 120.00 dB  
 PL12 19.00 dB  
 SF02 500.1320005 MHz

F2 - Processing parameters  
 SI 32768  
 SF 125.7577941 MHz  
 MDW EM  
 SSB 0  
 LB 1.00 Hz  
 GB 0  
 PC 1.40

10 NMR plot parameters  
 CX 20.00 cm  
 F1P 215.000 ppm  
 F1 27037.92 Hz  
 F2P -5.000 ppm  
 F2 -628.79 Hz  
 PPMCM 11.00000 ppm/cm  
 HZCM 1383.33582 Hz/cm

7.264  
3.790  
3.777  
3.767  
3.755  
3.744  
3.733  
3.725  
3.718  
3.716  
3.709  
3.701  
3.696  
3.687  
3.678  
2.832  
2.823  
2.650  
2.641  
2.273  
2.115  
2.106  
2.097  
2.000  
1.990  
1.985  
1.974  
1.971  
1.961  
1.955  
1.945  
1.892  
1.883  
1.879  
1.870  
1.862  
1.853  
1.850  
1.841  
1.589  
1.586  
1.582  
1.433  
1.386  
1.371  
0.000

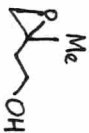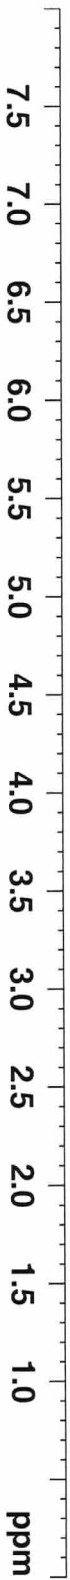

2.059

1.000

0.984

0.839

1.042

1.053

0.213

3.258

Current Data Parameters  
NAME ZL6R212H136A  
EXPNO 1  
PROCNO 1

F2 - Acquisition Parameter  
Date\_ 20090415  
Time 18.22

INSTRUM 5 mm PABBI 1H/  
PROBHD spect  
PULPROG zg

TD 59998  
SOLVENT CDCl3

NS 8  
DS 0  
SWH 10000.000 Hz

FIDRES 0.166672 Hz  
AQ 2.9999499 se

RG 256  
DE 50.000 use  
TE 7.50 use  
D1 295.6 K  
TD0 1.00000000 se

==== CHANNEL f1 =====  
NUC1 1H  
P1 5.35 use  
PL1 0.00 dB  
SFO1 499.8729992 MHz

F2 - Processing parameters  
SI 32768  
SF 499.8700151 MHz  
WDW EM  
SSB 0  
LB 0.30 Hz  
GB 0  
PC 1.00

ppm

7.274  
7.266  
6.981

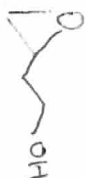

5.026  
3.836  
3.826  
3.814  
3.802  
3.490  
3.121  
3.115  
3.112  
3.108  
3.102  
2.827  
2.818  
2.809  
2.611  
2.606  
2.602  
2.596  
2.013  
2.005  
2.000  
1.997  
1.992  
1.988  
1.985  
1.976  
1.733  
1.721  
1.704  
1.432  
1.225  
1.210

Integral

2.0835  
0.0775  
1.0000  
1.0298  
1.0375  
2.0416  
1.0743  
0.1582  
0.1299

ppm

7  
6  
5  
4  
3  
2  
1

Current Data Parameters  
NAME ZL6R242H146B  
EXPNO 1  
PROCNO 1

F2 - Acquisition Parameters

Date\_ 20090414  
Time 18.25  
INSTRUM spect  
PROBHD 5 mm QNP 1H  
PULPROG zg  
TD 48076  
SOLVENT CDCl3  
NS 8  
DS 0  
SMH 8012.820 Hz  
FIDRES 0.166670 Hz  
AQ 2.9999924 sec  
RG 128  
DM 62.400 usec  
DE 4.50 usec  
TE 300.0 K  
D1 3.00000000 sec

===== CHANNEL f1 =====

NUC1 1H  
P1 9.50 usec  
PL1 0.00 dB  
SF01 500.1325006 MHz

F2 - Processing parameters

SI 65536  
SF 500.1300068 MHz  
WDW EM  
SSB 0  
LB 0.30 Hz  
GB 0  
PC 1.00

1D NMR plot parameters

CX 20.00 cm  
F1P 8.000 ppm  
F1 4001.04 Hz  
F2P 0.000 ppm  
F2 0.00 Hz  
PPMCM 0.40000 ppm/cm  
HZCM 200.05200 Hz/cm

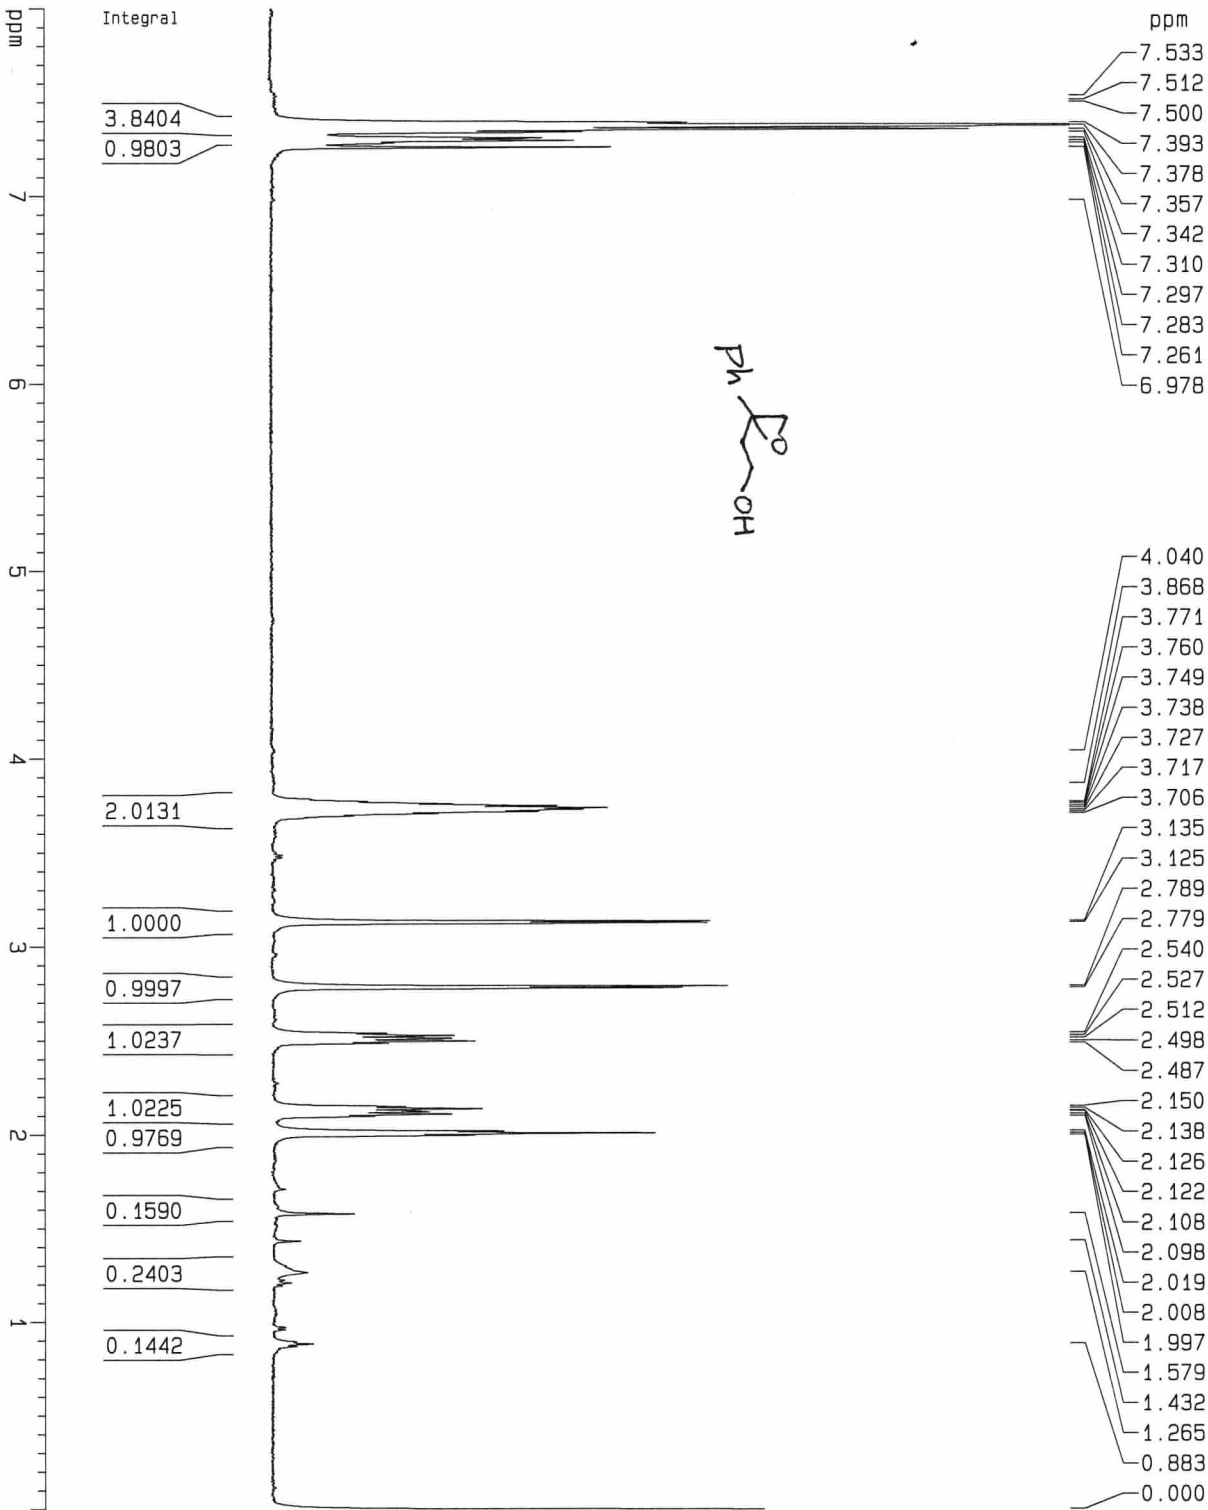

Current Data Parameters  
 NAME ZL6R243H149A  
 EXPNO 1  
 PROCNO 1

F2 - Acquisition Parameters  
 Date\_ 20090420  
 Time 12.56

INSTRUM spect  
 PROBHD 5 mm QNP 1H  
 PULPROG zg  
 TD 48076  
 SOLVENT CDCl3  
 NS 8  
 DS 0  
 SMH 8012.820 Hz  
 FIDRES 0.166670 Hz  
 AQ 2.9999924 sec  
 RG 256  
 DW 62.400 usec  
 DE 4.50 usec  
 TE 300.0 K  
 D1 3.00000000 sec

==== CHANNEL f1 =====

NUC1 1H  
 P1 9.50 usec  
 PL1 0.00 dB  
 SF01 500.1325006 MHz

F2 - Processing parameters

SI 65536  
 SF 500.1300143 MHz  
 WDW EM  
 SSB 0  
 LB 0.30 Hz  
 GB 0  
 PC 1.00

1D NMR plot parameters

CX 20.00 cm  
 F4P 8.000 ppm  
 F1 4001.04 Hz  
 F2P 0.000 ppm  
 F2 0.00 Hz  
 PPMCM 0.40000 ppm/cm  
 HZCM 200.05200 Hz/cm

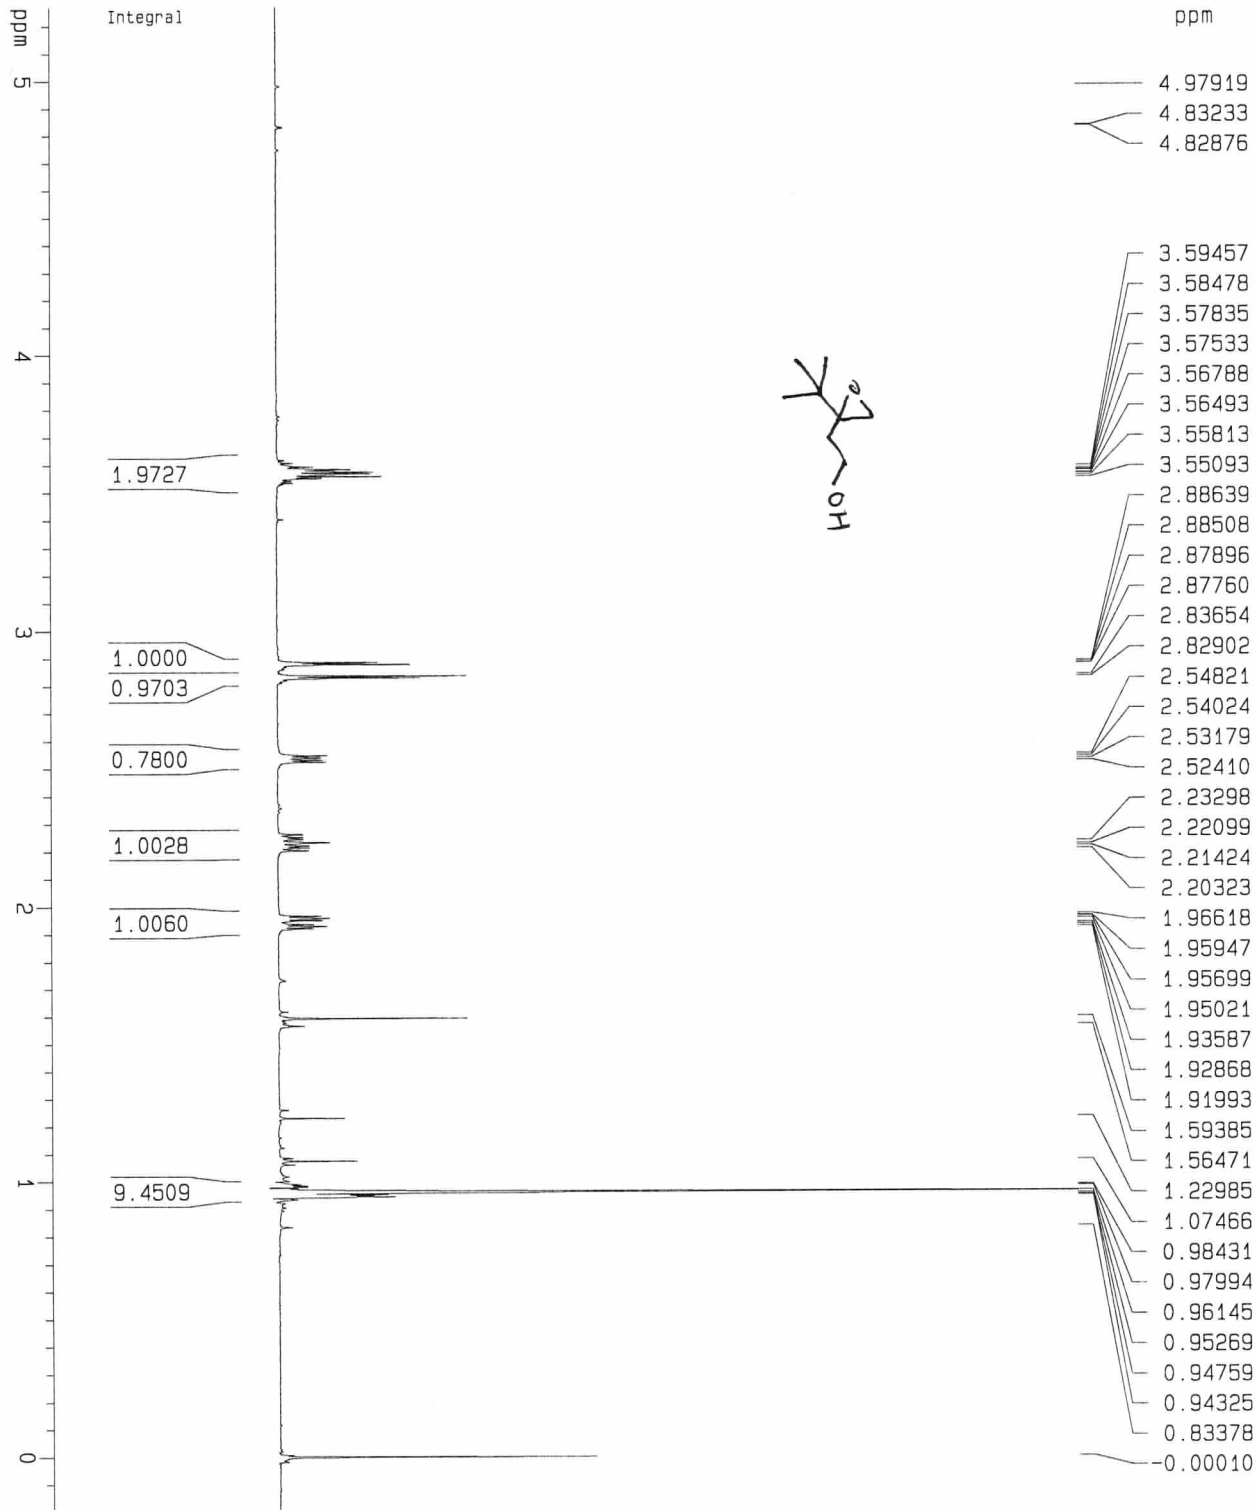

Current Data Parameters  
 NAME ZL7R279H095A  
 EXPNO 1  
 PROCNO 1

F2 - Acquisition Parameters  
 Date\_ 20100128  
 Time 23.54  
 INSTRUM spect  
 PROBD 5 mm QNP 1H  
 PULPROG zg  
 TD 48076  
 SOLVENT Aceton  
 NS 8  
 DS 0  
 SWH 8012.820 Hz  
 FIDRES 0.166670 Hz  
 AQ 2.9999924 sec  
 RG 256  
 DW 62.400 usec  
 DE 4.50 usec  
 TE 300.0 K  
 D1 3.00000000 sec

==== CHANNEL f1 =====  
 NUC1 1H  
 P1 9.00 usec  
 PL1 0.00 dB  
 SF01 500.1325006 MHz

F2 - Processing parameters  
 SI 65536  
 SF 500.1300124 MHz  
 KW EM  
 SSB 0  
 LB 0.30 Hz  
 GB 0  
 PC 1.00

1D NMR plot parameters  
 CX 20.00 cm  
 F1P 5.269 ppm  
 F1 2635.29 Hz  
 F2P -0.191 ppm  
 F2 -95.54 Hz  
 PPMCM 0.27301 ppm/cm  
 HZCM 136.54134 Hz/cm



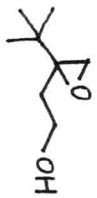

ppm

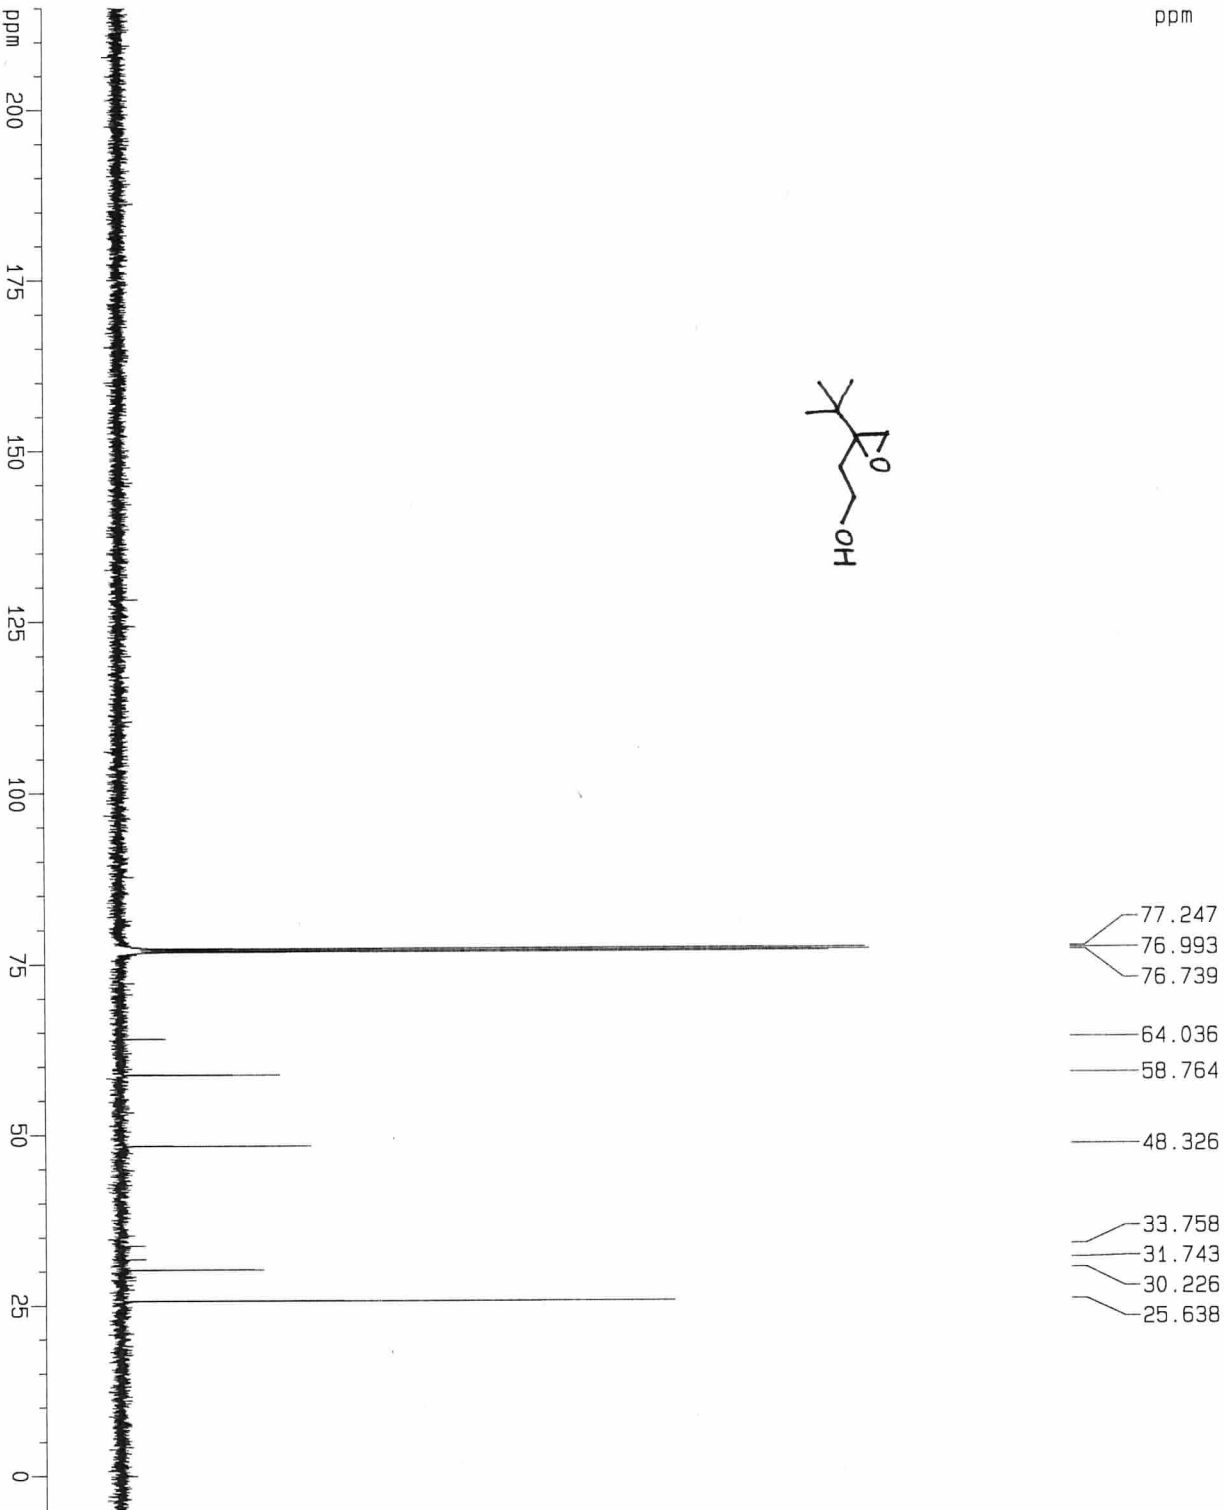

- 77.247
- 76.993
- 76.739
- 64.036
- 58.764
- 48.326
- 33.758
- 31.743
- 30.226
- 25.638

Current Data Parameters  
 NAME ZL7R279C095A  
 EXPNO 1  
 PROCNO 1

F2 - Acquisition Parameters  
 Date\_ 20100128  
 Time 23.21

INSTRUM spect  
 PROBHD 5 mm QNP 1H  
 PULPROG zgpg30  
 TD 65536  
 SOLVENT CDCl3  
 NS 2048  
 DS 4  
 SWH 37593.984 Hz  
 FIDRES 0.500026 Hz  
 AQ 0.9999972 sec

RG 8192  
 DW 13.300 usec  
 DE 7.50 usec  
 TE 300.0 K  
 D1 0.10000000 sec  
 d11 0.03000000 sec

==== CHANNEL f1 =====  
 NUC1 13C  
 P1 4.60 usec  
 PL1 0.00 dB  
 SF01 125.7690572 MHz

==== CHANNEL f2 =====  
 CPDPRG2 waltz16  
 NUC2 1H  
 PCPD2 90.00 usec  
 PL2 120.00 dB  
 PL12 19.00 dB  
 SF02 500.1320005 MHz

F2 - Processing parameters  
 SI 32768  
 SF 125.7577929 MHz  
 KDM EM  
 SSB 0  
 LB 1.00 Hz  
 GB 0  
 PC 1.40

1D NMR plot parameters  
 CX 20.00 cm  
 F1P 215.000 ppm  
 F1 27037.93 Hz  
 F2P -5.000 ppm  
 F2 -628.79 Hz  
 PPMCM 11.00000 ppm/cm  
 HZCM 1383.33669 Hz/cm

ppm

7.891300  
7.876399  
7.873884  
7.825768  
7.809321  
7.555693  
7.552887  
7.539176  
7.523565  
7.520863  
7.507289  
7.504926  
7.472983  
7.458691  
7.456697  
7.253079

3.765006  
3.755382  
3.751353  
3.742311  
3.732936  
3.728933  
3.719282  
3.702105  
3.692820  
3.687897  
3.678813  
3.670371  
3.665465  
3.656195  
3.340572  
3.330587  
2.981522  
2.971776  
2.455505  
2.439285  
2.428666  
2.274161  
2.262927

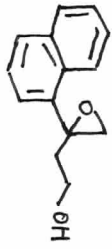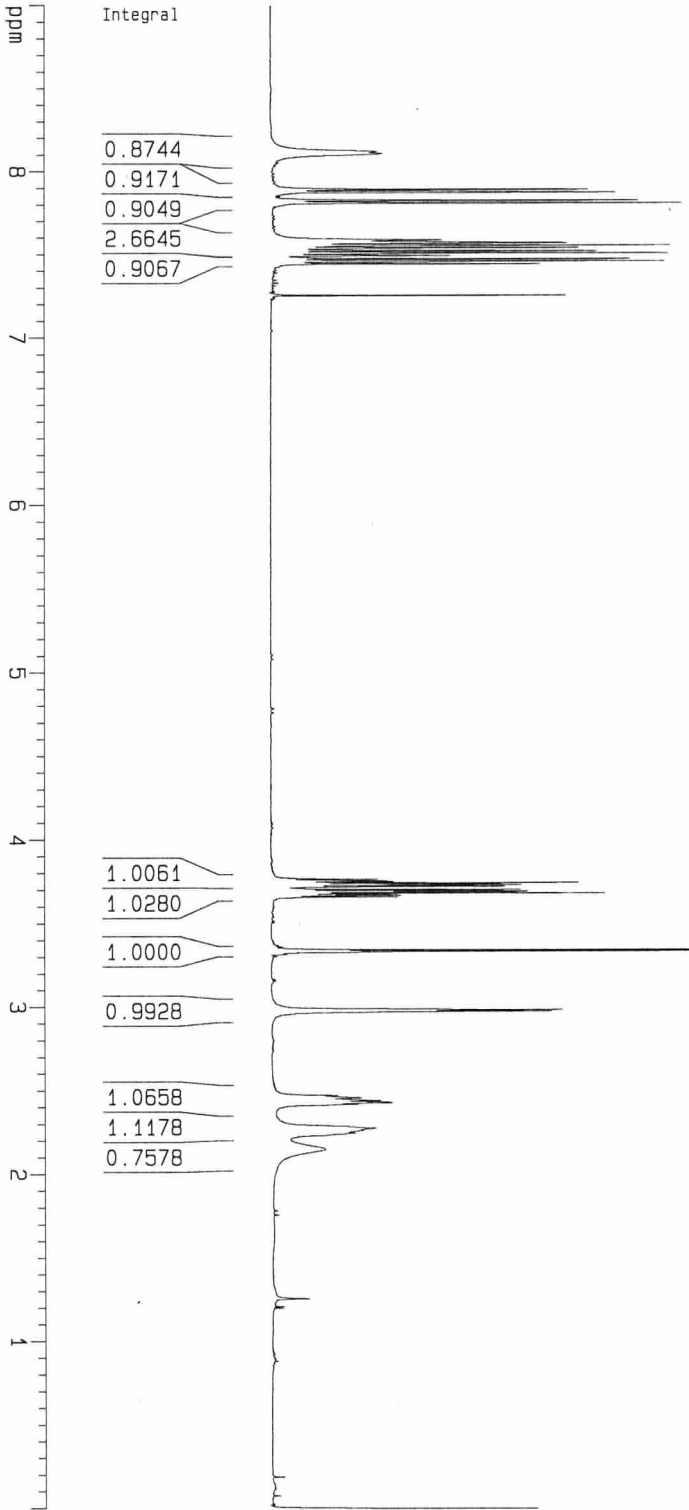

Current Data Parameters

NAME ZL7R282H077A  
EXPNO 1  
PROCNO 1

F2 - Acquisition Parameters

Date\_ 20100129  
Time 0.08  
INSTRUM spect  
PROBHD 5 mm QNP 1H  
PULPROG zg  
TD 48076  
SOLVENT Aceton  
NS 8  
DS 0  
SWH 8012.820 Hz  
FIDRES 0.166670 Hz  
AQ 2.9999924 sec  
RG 128  
DW 62.400 usec  
DE 4.50 usec  
TE 300.0 K  
D1 3.00000000 sec

==== CHANNEL f1 =====

NUC1 1H  
P1 9.00 usec  
PL1 0.00 dB  
SF01 500.1325006 MHz

F2 - Processing parameters

SI 65536  
SF 500.1300169 MHz  
WDW EM  
SSB 0  
LB 0.30 Hz  
GB 0  
PC 1.00

1D NMR plot parameters

CX 20.00 cm  
F1P 9.000 ppm  
F1 4501.17 Hz  
F2P 0.000 ppm  
F2 0.00 Hz  
PPMCM 0.45000 ppm/cm  
HZCM 225.05850 Hz/cm

ppm

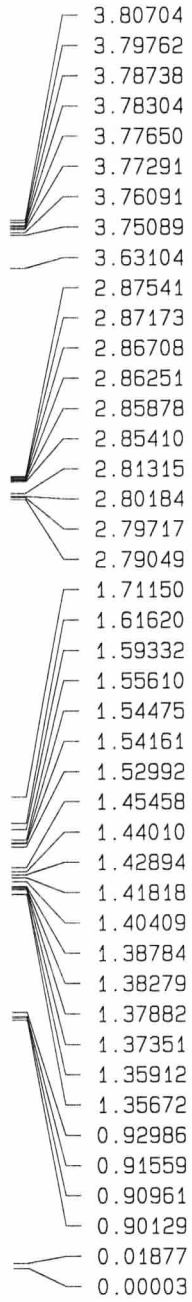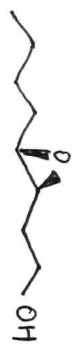

ppm

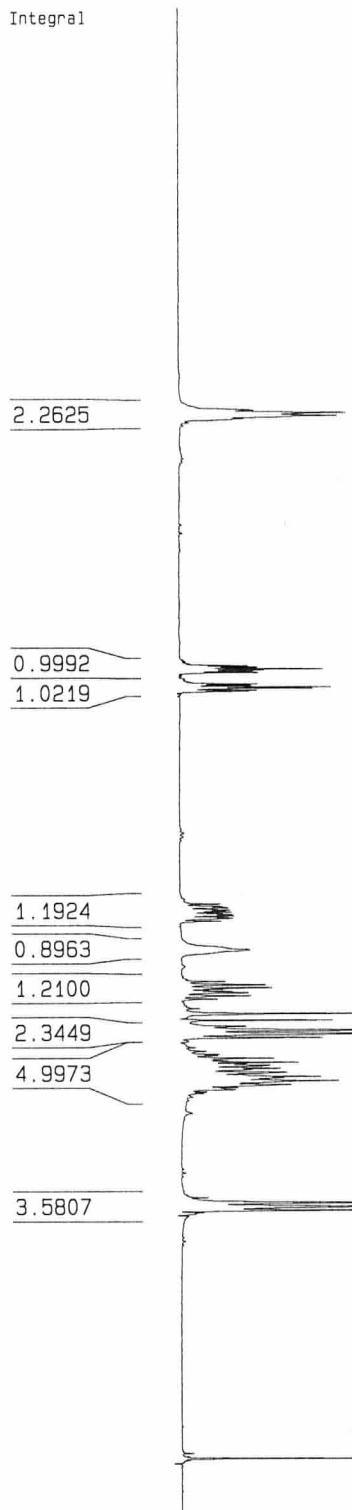

Current Data Parameters  
 NAME ZL7R241H110A  
 EXPNO 1  
 PROCNO 1

F2 - Acquisition Parameters  
 Date\_ 20100129  
 Time 0.01

INSTRUM spect  
 PROBHD 5 mm QNP 1H  
 PULPROG zg  
 TD 48076  
 SOLVENT Aceton  
 NS 8  
 DS 0

SWH 8012.820 Hz  
 FIDRES 0.166670 Hz  
 AQ 2.9999924 sec  
 RG 128  
 DW 62.400 usec  
 DE 4.50 usec  
 TE 300.0 K  
 D1 3.00000000 sec

==== CHANNEL f1 =====  
 NUC1 1H  
 P1 9.00 usec  
 PL1 0.00 dB  
 SFO1 500.1325006 MHz

F2 - Processing parameters  
 SI 65536  
 SF 500.1300109 MHz  
 WDM EM  
 SSB 0  
 LB 0.30 Hz  
 GB 0  
 PC 1.00

1D NMR plot parameters  
 CX 20.00 cm  
 F1P 5.269 ppm  
 F1 2635.29 Hz  
 F2P -0.191 ppm  
 F2 -95.54 Hz  
 PPMCM 0.27301 ppm/cm  
 HZCM 136.54134 Hz/cm

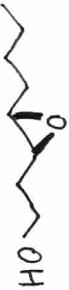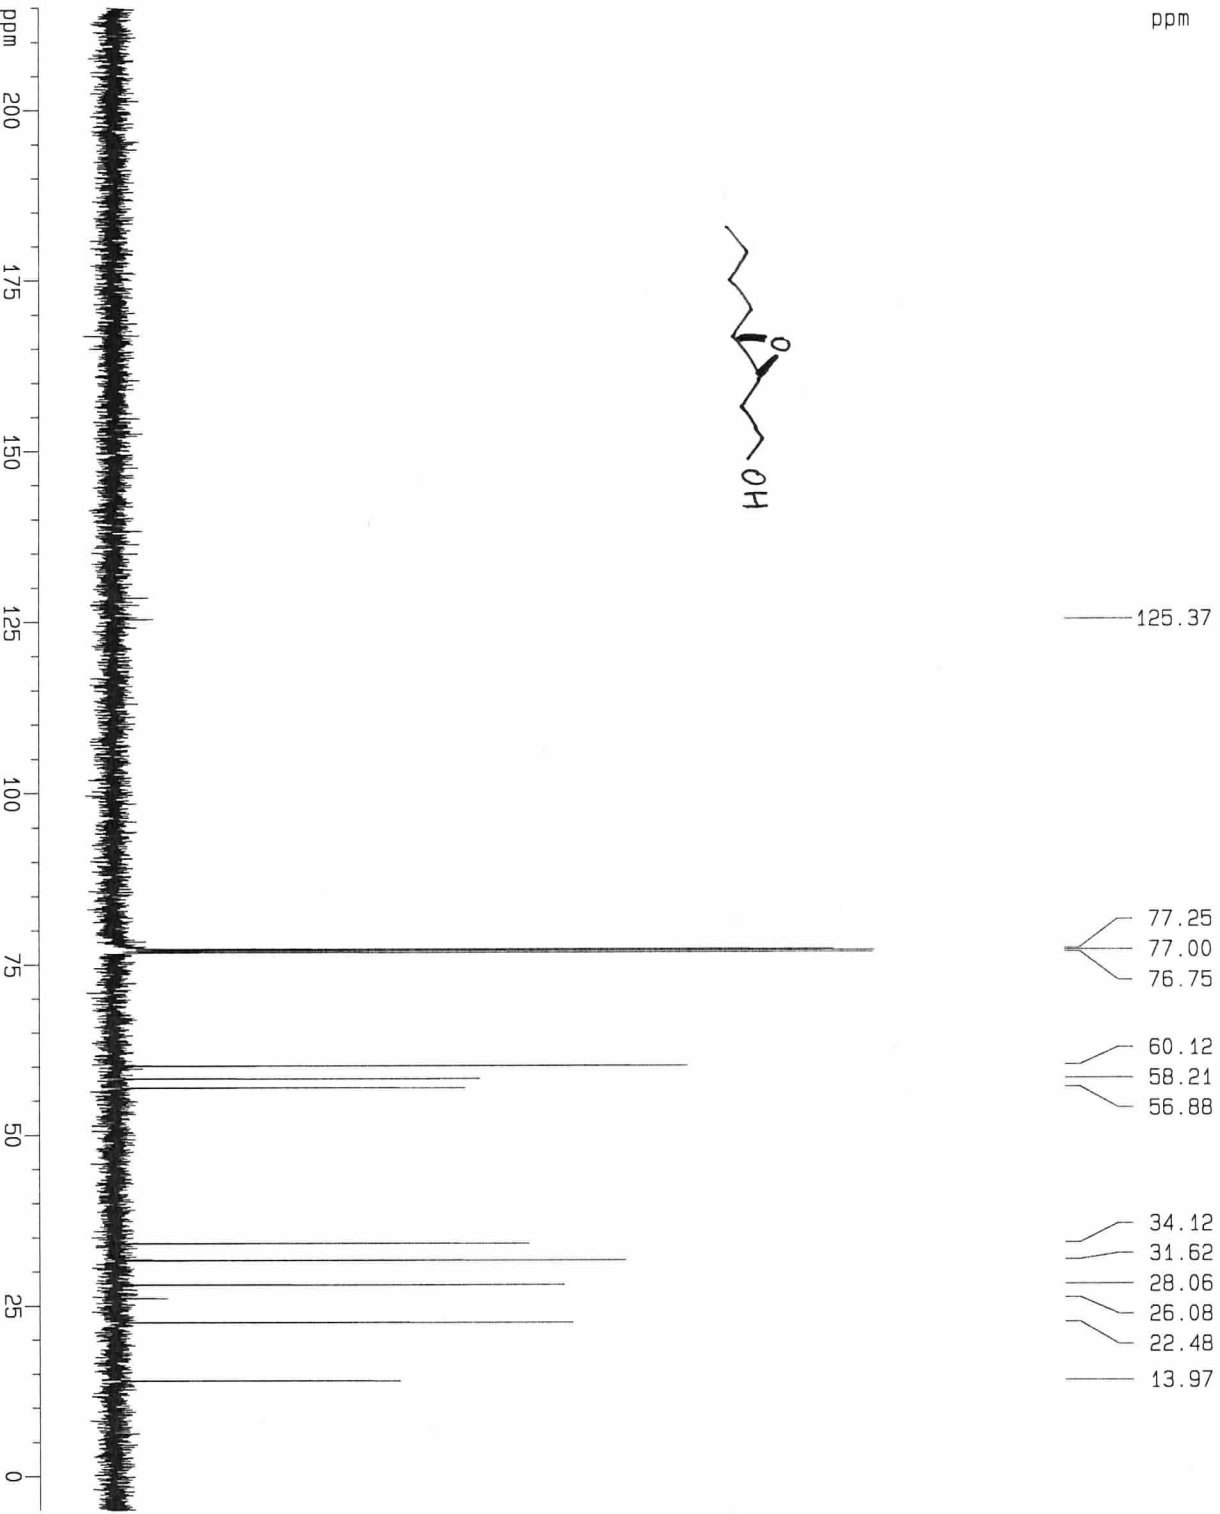

Current Data Parameters  
 NAME ZL7R241C110A  
 EXPNO 1  
 PROCNO 1

F2 - Acquisition Parameters  
 Date\_ 20100128  
 Time 17.56

INSTRUM spect  
 PROBD 5 mm QNP 1H  
 PULPROG zgdc  
 TD 75184  
 SOLVENT CDCl3  
 NS 499  
 DS 0

SWH 37593.984 Hz  
 FIDRES 0.500025 Hz  
 AQ 0.9999972 sec  
 RG 8192  
 DW 13.300 usec  
 DE 7.50 usec  
 TE 300.0 K

D1 0.10000000 sec  
 D11 0.03000000 sec

==== CHANNEL f1 =====

NUC1 13C  
 P1 4.60 usec  
 PL1 0.00 dB  
 SF01 125.7690572 MHz

==== CHANNEL f2 =====

CPDPRG2 waltz16  
 NUC2 1H  
 PCPD2 90.00 usec  
 PL2 120.00 dB  
 PL12 19.00 dB  
 SF02 500.1320005 MHz

F2 - Processing parameters

SI 32768  
 SF 125.7577929 MHz  
 WDM EM  
 SSB 0  
 LB 1.00 Hz  
 GB 0  
 PC 1.40

1D NMR plot parameters

CX 20.00 cm  
 F1P 245.000 ppm  
 F1 27037.93 Hz  
 F2P -5.000 ppm  
 F2 -628.79 Hz  
 PPMCM 11.00000 ppm/cm  
 HZCM 1383.33569 Hz/cm

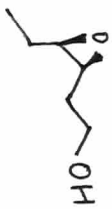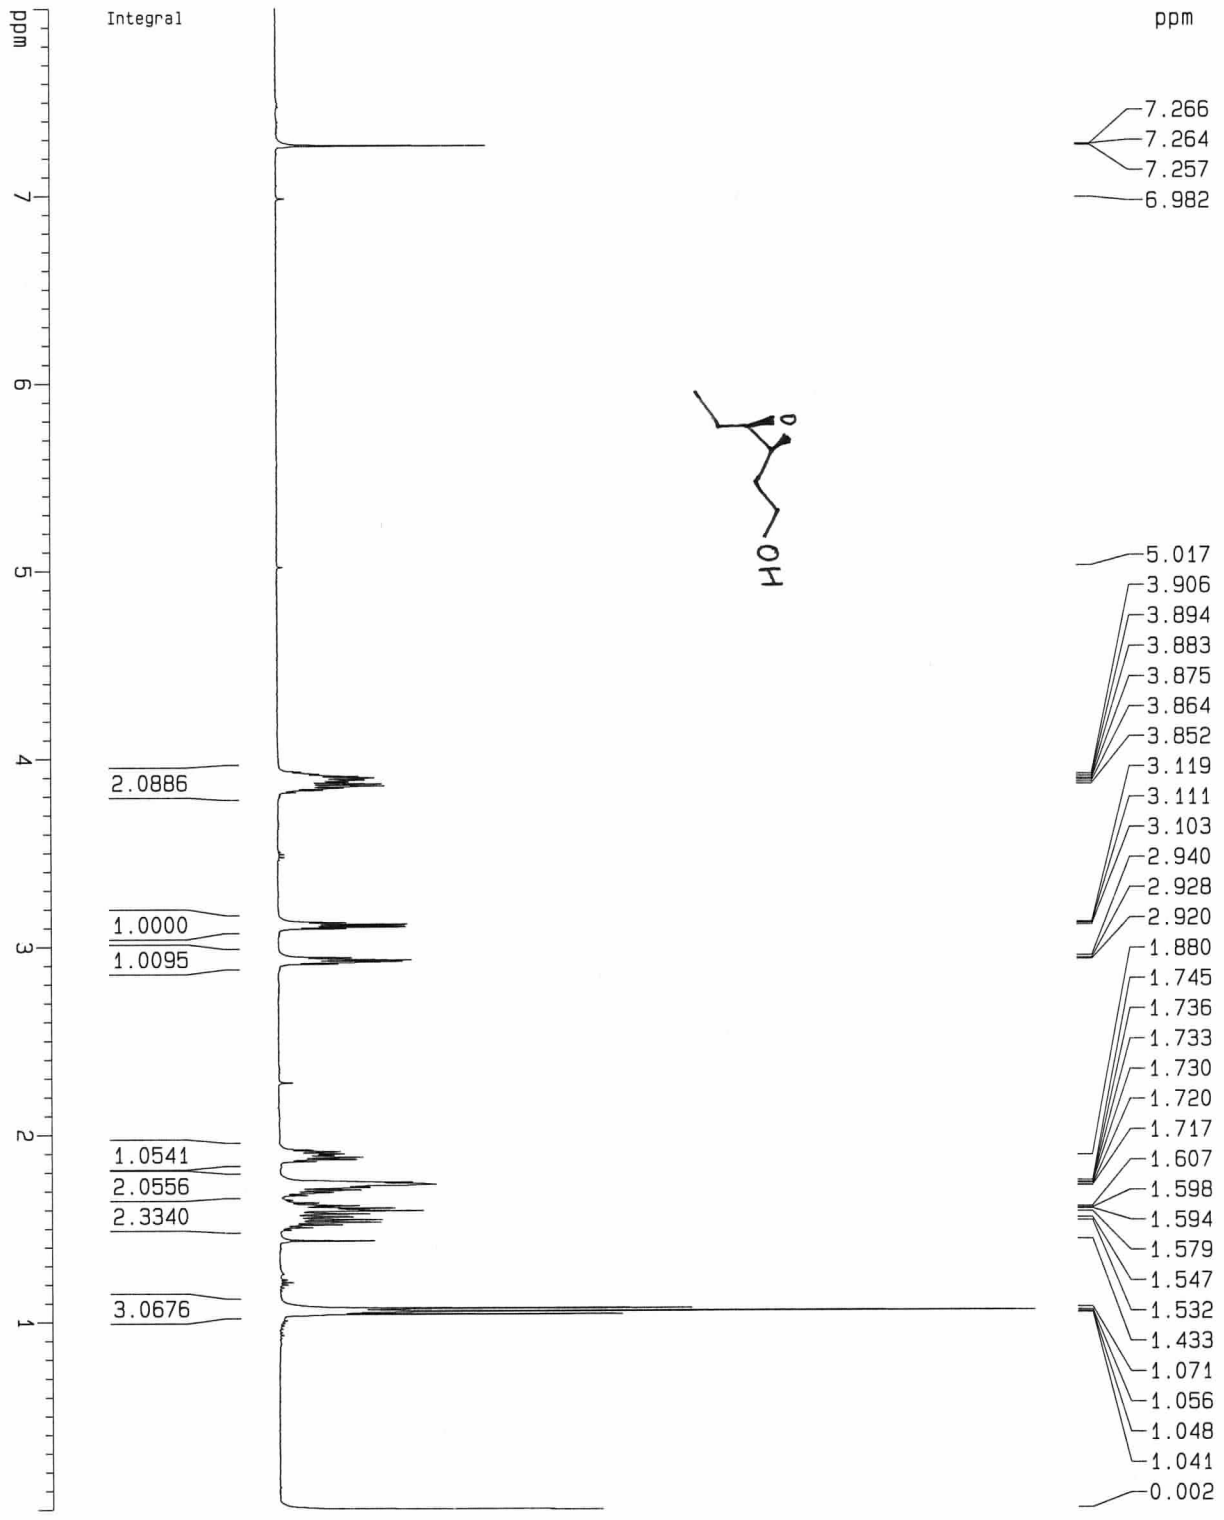

7.266  
7.264  
7.257  
6.982

5.017  
3.906  
3.894  
3.883  
3.875  
3.864  
3.852  
3.119  
3.111  
3.103  
2.940  
2.928  
2.920  
1.880  
1.745  
1.736  
1.733  
1.730  
1.720  
1.717  
1.607  
1.598  
1.594  
1.579  
1.547  
1.532  
1.433  
1.071  
1.056  
1.048  
1.041  
0.002

2.0886

1.0000  
1.0095

1.0541  
2.0556  
2.3340

3.0676

Current Data Parameters  
 NAME ZLGR244H139A  
 EXPNO 1  
 PROCNO 1

F2 - Acquisition Parameters  
 Date\_ 20090416  
 Time 0.36  
 INSTRUM spect  
 PROBHD 5 mm QNP 1H  
 PULPROG zg  
 TD 48076  
 SOLVENT CDCl3  
 NS 8  
 DS 0  
 SWH 8012.820 Hz  
 FIDRES 0.166670 Hz  
 AQ 2.9999924 sec  
 RG 256  
 DW 62.400 usec  
 DE 4.50 usec  
 TE 300.0 K  
 D1 3.00000000 sec

===== CHANNEL f1 =====  
 NUC1 1H  
 P1 9.50 usec  
 PL1 0.00 dB  
 SF01 500.1325006 MHz

F2 - Processing parameters  
 SI 65536  
 SF 500.1300114 MHz  
 WDW EM  
 SSB 0  
 LB 0.30 Hz  
 GB 0  
 PC 1.00

1D NMR plot parameters  
 CX 20.00 cm  
 F1P 8.000 ppm  
 F1 4001.04 Hz  
 F2P 0.000 ppm  
 F2 0.00 Hz  
 PPMCM 0.40000 ppm/cm  
 HZCM 200.05200 Hz/cm

ppm  
 7.267  
 7.265  
 6.980

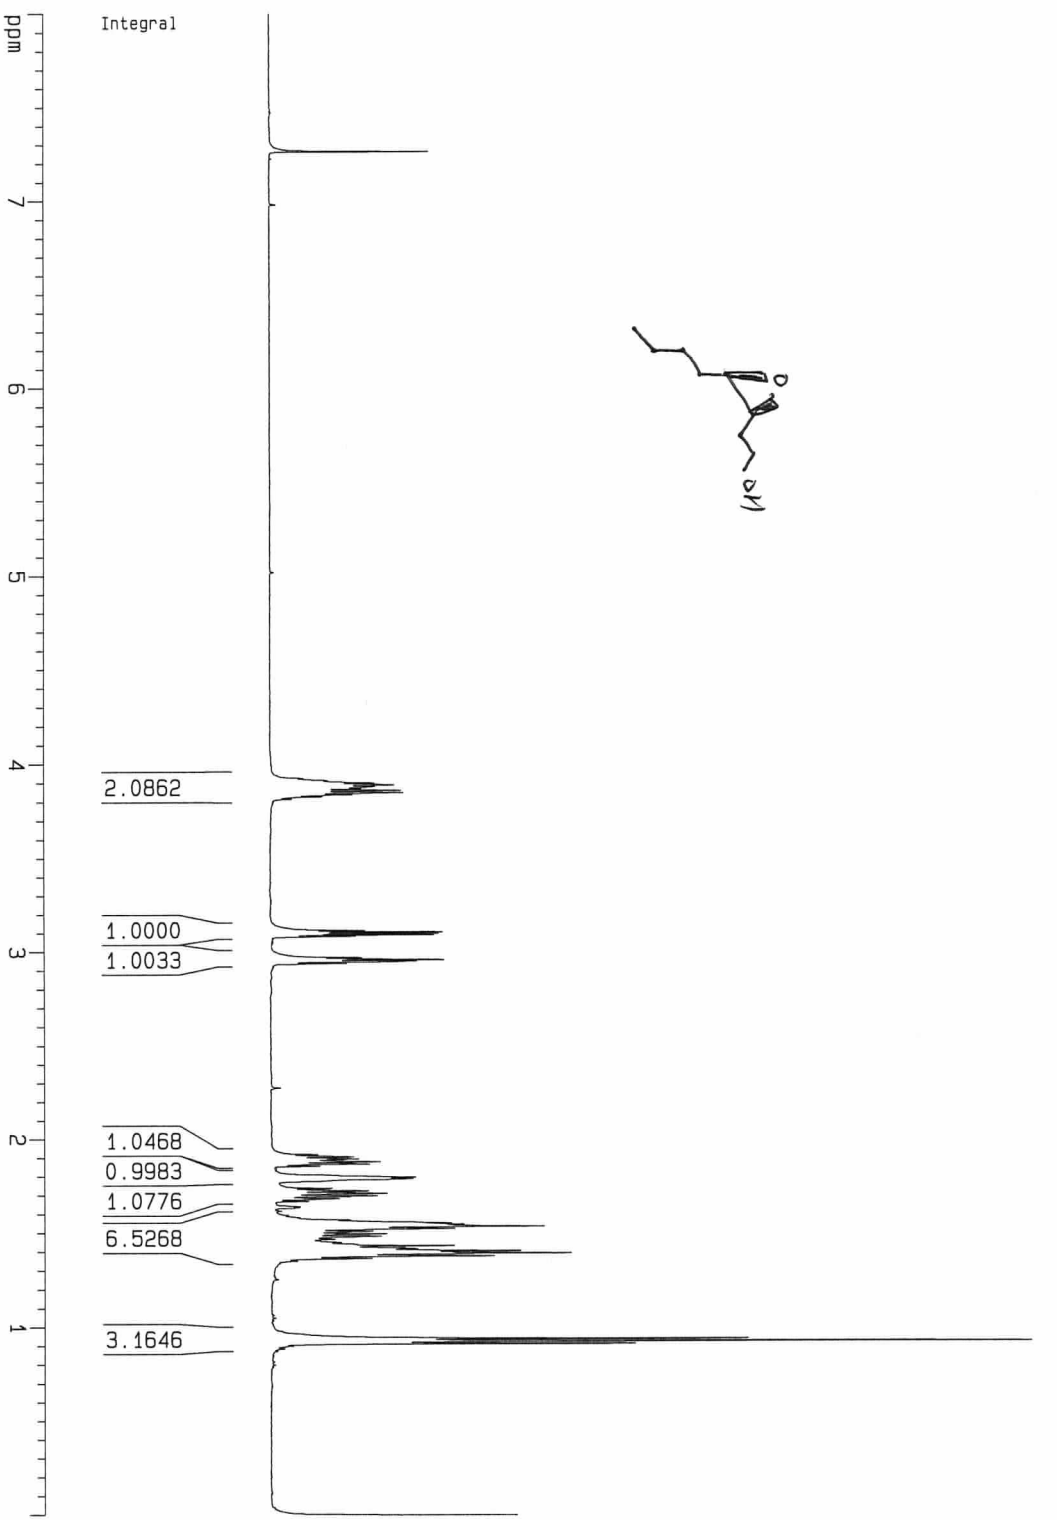

Current Data Parameters  
 NAME ZLBR171H138A  
 EXPNO 1  
 PROCNO 1

F2 - Acquisition Parameters  
 Date\_ 20090416  
 Time 13.11  
 INSTRUM spect  
 PROBHD 5 mm GNP 1H  
 PULPROG zg  
 TD 48076  
 SOLVENT CDCl3  
 NS 8  
 DS 0  
 SMH 8012.820 HZ  
 FIDRES 0.166670 HZ  
 AQ 2.9999924 sec  
 RG 256  
 DW 62.400 usec  
 DE 4.50 usec  
 TE 300.0 K  
 D1 3.00000000 sec

==== CHANNEL f1 =====  
 NUC1 1H  
 P1 9.50 usec  
 PL1 0.00 dB  
 SFO1 500.1325006 MHz

F2 - Processing parameters  
 SI 65536  
 SF 500.1300112 MHz  
 WDW EM  
 SSB 0  
 LB 0.30 HZ  
 GB 0  
 PC 1.00

1D NMR plot parameters  
 CX 20.00 cm  
 F1P 8.000 ppm  
 F1 4001.04 Hz  
 F2P 0.000 ppm  
 F2 0.00 Hz  
 PPMCM 0.40000 ppm/cm  
 HZCM 200.05200 Hz/cm

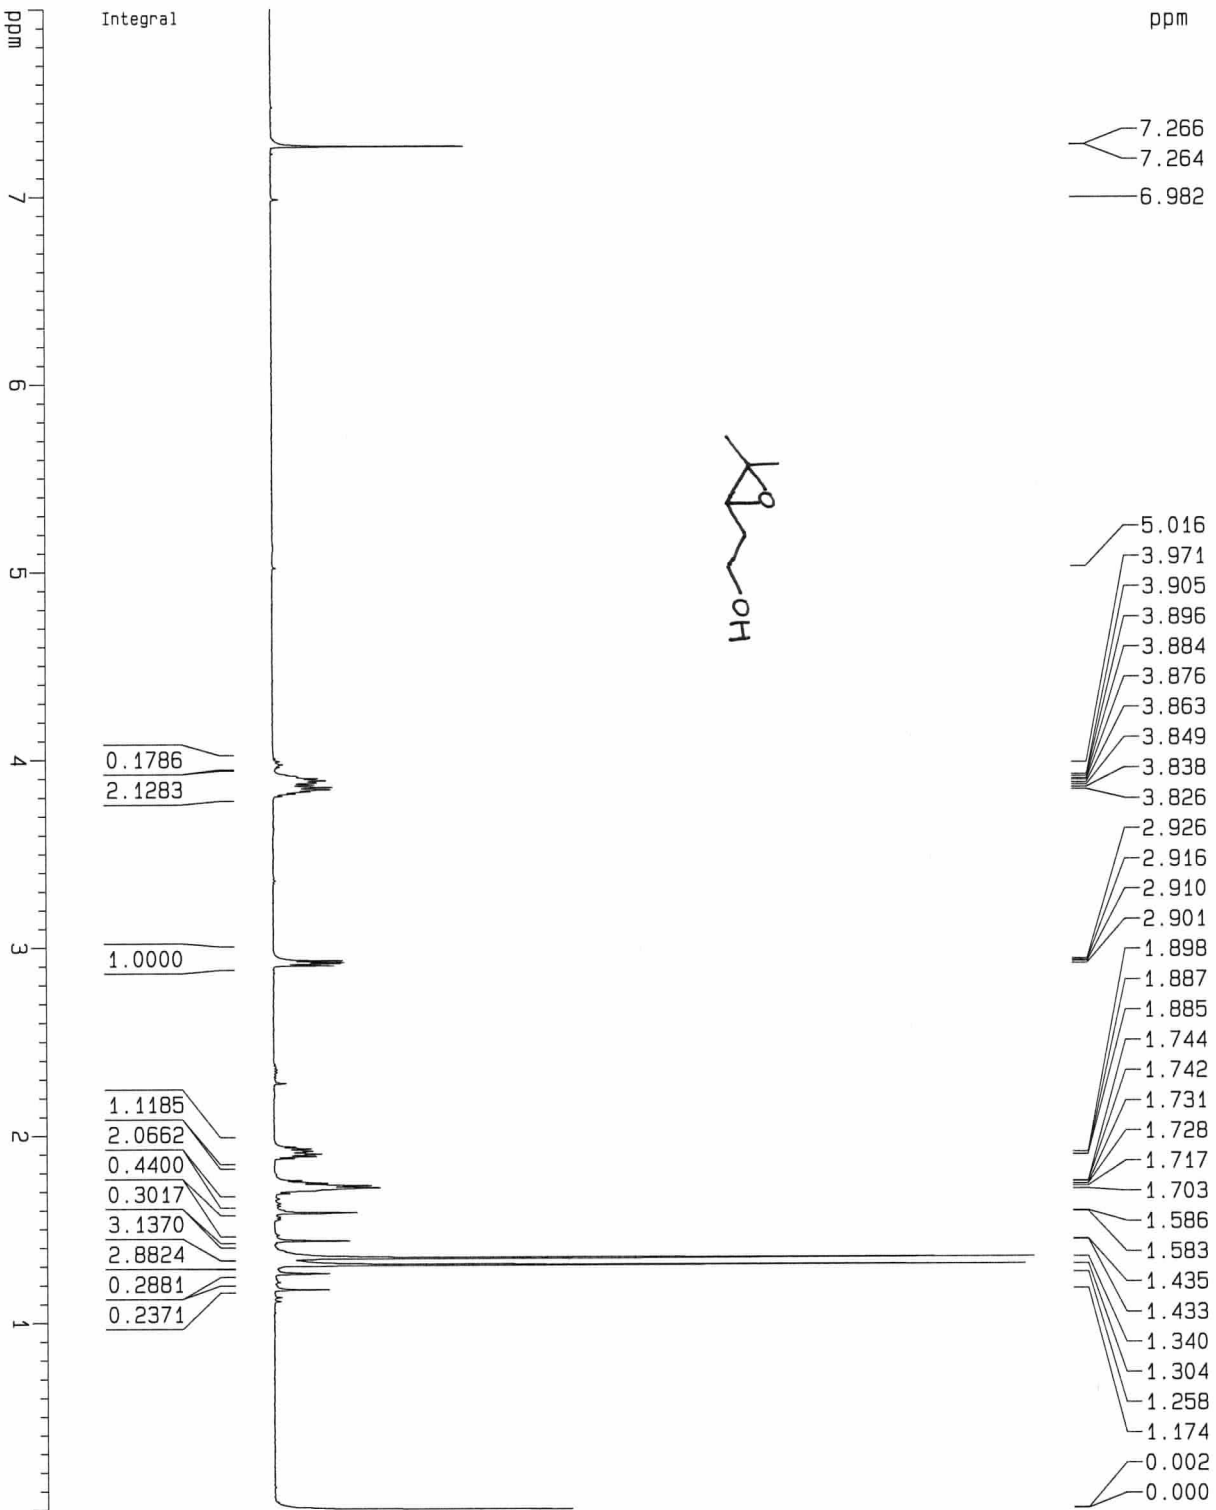

Current Data Parameters  
 NAME ZL6R247H144A  
 EXPNO 1  
 PROCNO 1

F2 - Acquisition Parameters  
 Date\_ 20090415  
 Time 22:59  
 INSTRUM spect  
 PROBHID 5 mm QNP 1H  
 PULPROG zg  
 TD 48076  
 SOLVENT CDC13  
 NS 8  
 DS 0  
 SMH 8012.820 Hz  
 FIDRES 0.166670 Hz  
 AQ 2.9999924 sec  
 RG 512  
 DW 62.400 usec  
 DE 4.50 usec  
 TE 300.0 K  
 D1 3.00000000 sec

==== CHANNEL f1 =====  
 NUC1 1H  
 P1 9.50 usec  
 PL1 0.00 dB  
 SF01 500.1325006 MHz

F2 - Processing parameters  
 SI 65536  
 SF 500.1300116 MHz  
 WDW EM  
 SSB 0  
 LB 0.30 Hz  
 GB 0  
 PC 1.00

1D NMR plot parameters  
 CX 20.00 cm  
 F1P 8.000 ppm  
 F1 4001.04 Hz  
 F2P 0.000 ppm  
 F2 0.00 Hz  
 PPKCM 0.40000 ppm/cm  
 HZCM 200.05200 Hz/cm

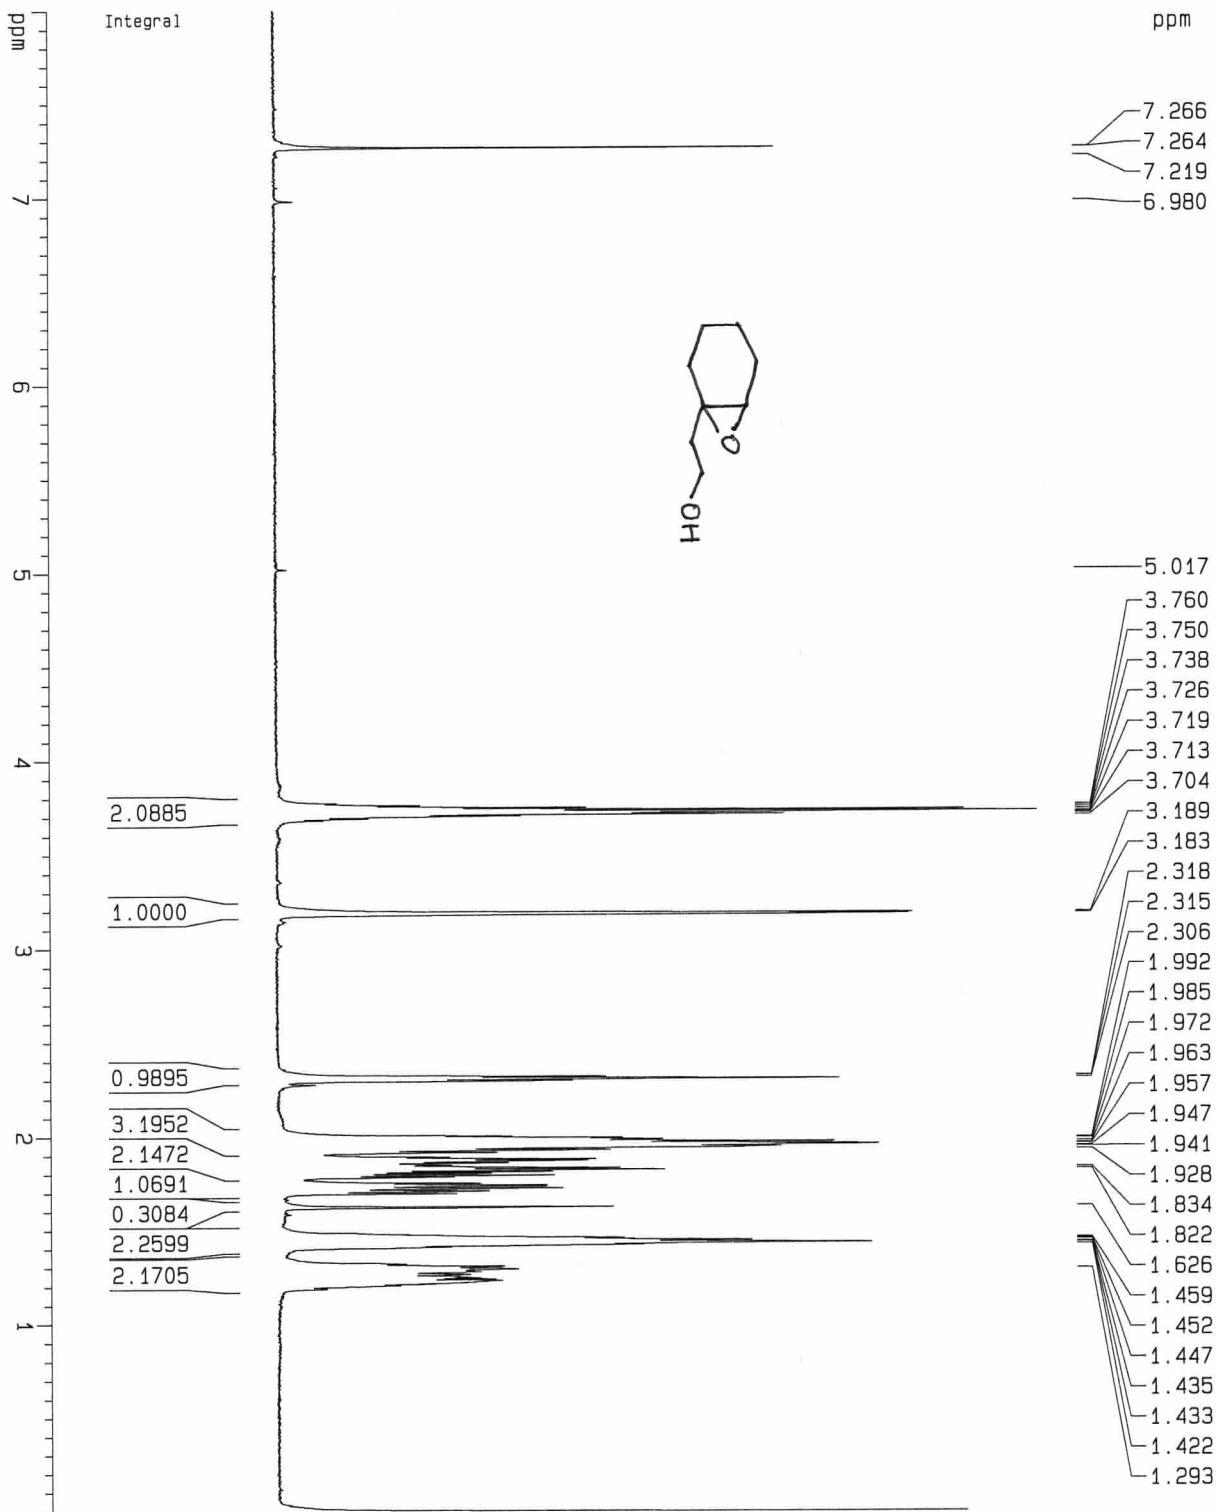

Current Data Parameters  
 NAME ZL6R248H145A  
 EXPNO 1  
 PROCNO 1

F2 - Acquisition Parameters  
 Date\_ 20090416  
 Time 13.16  
 INSTRUM spect  
 PROBHD 5 mm QNP 1H  
 PULPROG zg  
 TD 48076  
 SOLVENT CDCl3  
 NS 8  
 DS 0  
 SMH 8012.820 Hz  
 FIDRES 0.166670 Hz  
 AQ 2.9999924 sec  
 RG 256  
 DW 62.400 usec  
 DE 4.50 usec  
 TE 300.0 K  
 D1 3.00000000 sec

==== CHANNEL f1 =====  
 NUC1 1H  
 P1 9.50 usec  
 PL1 0.00 dB  
 SF01 500.1325006 MHz

F2 - Processing parameters  
 SI 65536  
 SF 500.1300116 MHz  
 MDM EM  
 SSB 0  
 LB 0.30 Hz  
 GB 0  
 PC 1.00

1D NMR plot parameters  
 CX 20.00 cm  
 F1P 8.000 ppm  
 F1 4001.04 Hz  
 F2P 0.000 ppm  
 F2 0.00 Hz  
 PPMCM 0.40000 ppm/cm  
 HZCM 200.05200 Hz/cm



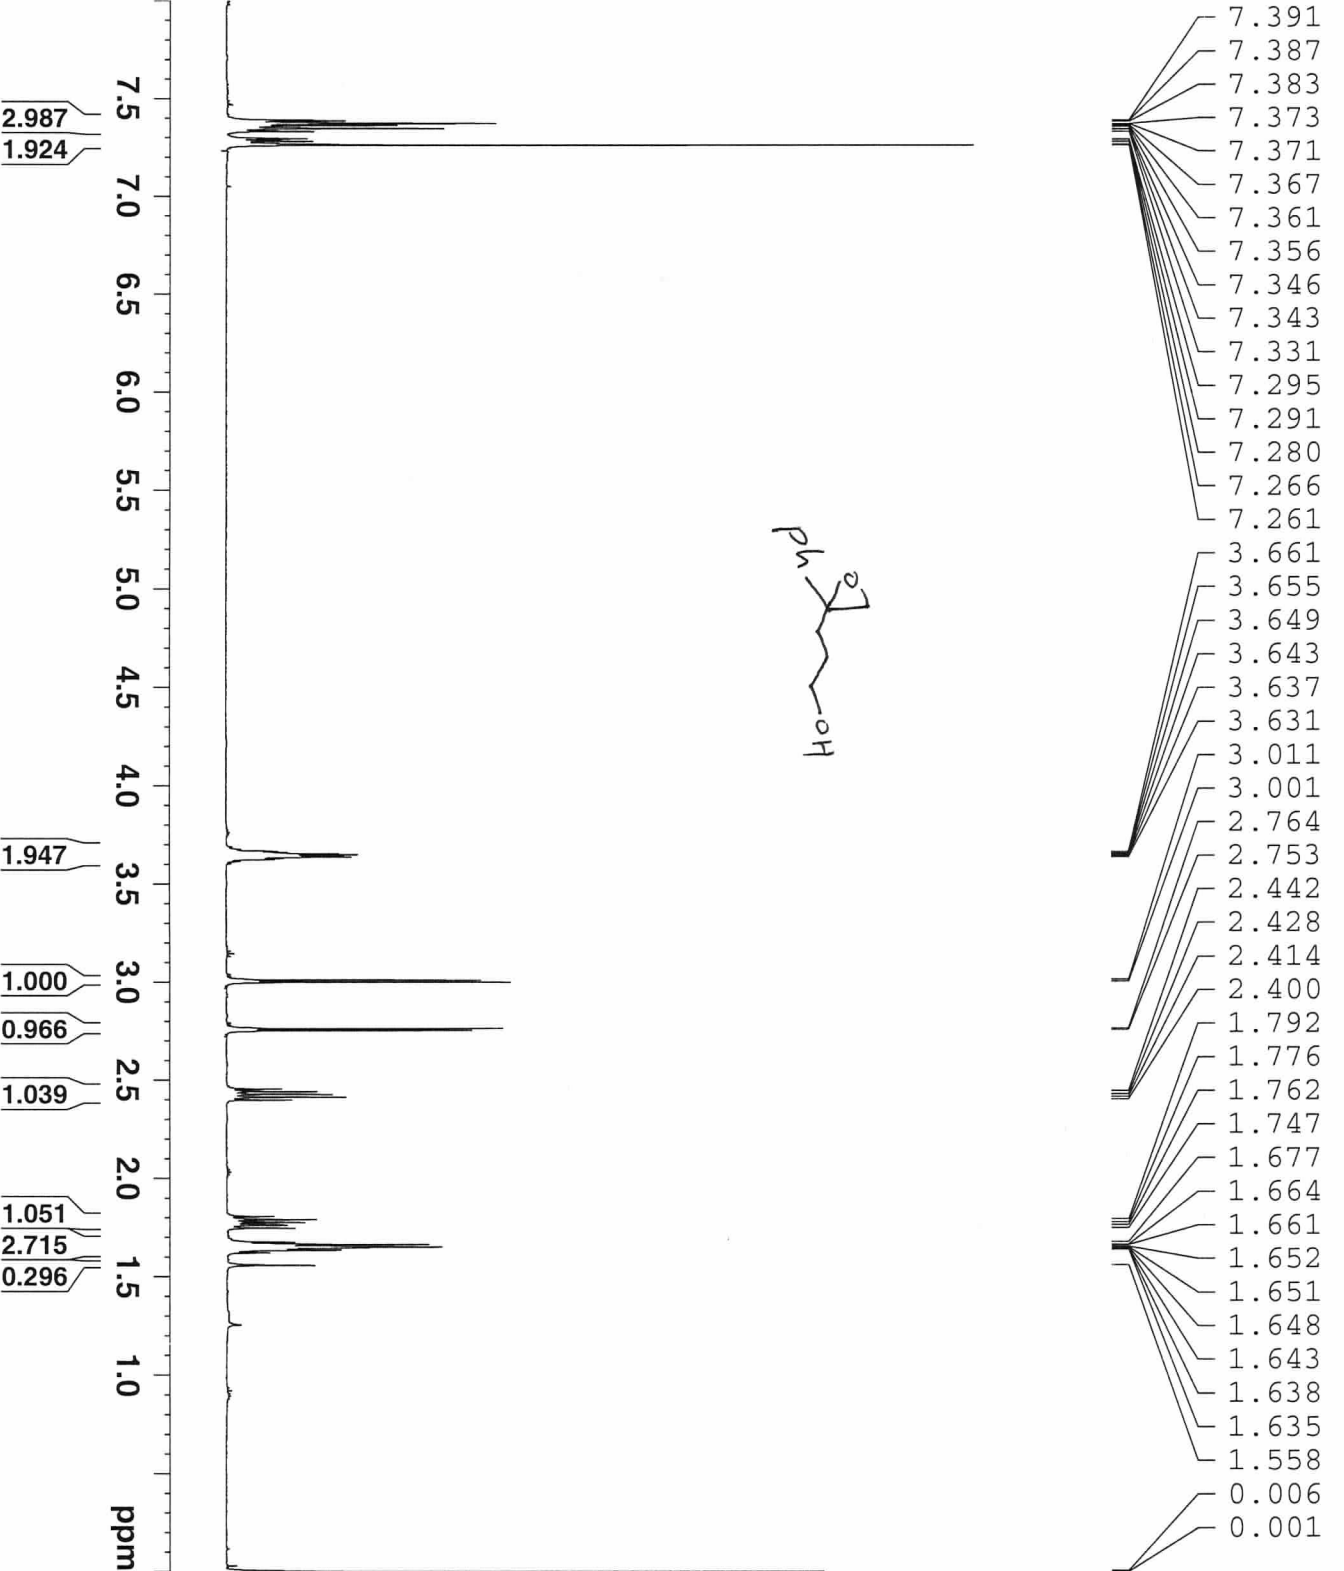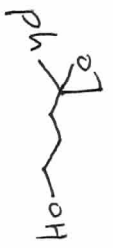

- 7.391
- 7.387
- 7.383
- 7.373
- 7.371
- 7.367
- 7.361
- 7.356
- 7.346
- 7.343
- 7.331
- 7.295
- 7.291
- 7.280
- 7.266
- 7.261
- 3.661
- 3.655
- 3.649
- 3.643
- 3.637
- 3.631
- 3.011
- 3.001
- 2.764
- 2.753
- 2.442
- 2.428
- 2.414
- 2.400
- 1.792
- 1.776
- 1.762
- 1.747
- 1.677
- 1.664
- 1.661
- 1.652
- 1.651
- 1.648
- 1.643
- 1.638
- 1.635
- 1.558
- 0.006
- 0.001

2.987  
1.924

1.947

1.000

0.966

1.039

1.051

2.715

0.296

ppm

```

Current Data Parameters
NAME          ZL7R192H079A
EXPNO         1
PROCNO        1

F2 - Acquisition Parameters
Date_         20091112
Time         1.46
INSTRUM      spect
PROBHD       5 mm PABBI 1H/
PULPROG      zg
TD           59998
SOLVENT      CDCl3
NS           8
DS           0
SWH          10000.000 Hz
FIDRES       0.166672 Hz
AQ           2.9999499 se
RG           256
DE           50.000 us
TE           7.50 us
D1           295.6 K
TD0          1.00000000 se
TD0          1

===== CHANNEL f1 =====
NUC1         1H
P1           5.35 us
PL1          0.00 dB
SFO1         499.8729992 MHz

F2 - Processing parameters
SI           32768
SF           499.8700172 MHz
WDW          EM
SSB          0
LB           0.30 Hz
GB           0
PC           1.00
  
```

7.931  
7.914  
7.449  
7.431  
7.330  
7.312  
7.296  
7.265

3.743  
3.646  
3.634  
3.621  
3.612  
3.106  
3.092  
3.006  
2.996  
2.720  
2.710  
2.424  
2.410  
2.396  
2.381  
2.367  
2.046  
2.025  
2.013  
1.783  
1.767  
1.751  
1.740  
1.737  
1.722  
1.648  
1.635

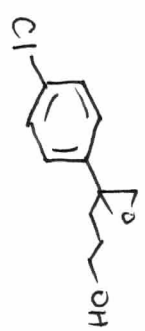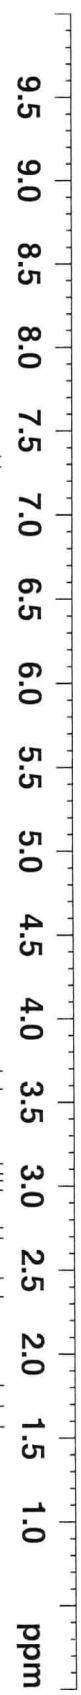

3.2421

2.0437

0.0972

1.0000

0.9766

1.0602

1.8231

2.1334

```

Current Data Parameters
NAME      ZL/R318H169A
EXPNO     1
PROCNO    1
F2 - Acquisition Parameters
Date_     20100107
Time      21.46
INSTRUM   spect
PROBHD    5 mm PABBI 1H/
PULPROG   zg
TD         59998
SOLVENT   CDCl3
NS         8
DS         0
SWH        10000.000 Hz
FIDRES     0.166672 Hz
AQ          2.9999499 sec
RG          45.3
DM          50.000 us
DE          1.50 us
TE          293.0 K
D1          1.00000000 sec
TD0         1

===== CHANNEL F1 =====
NUC1       1H
P1         5.35 us
PL1        0.00 dB
SFO1       499.8729992 MHz

F2 - Processing parameters
SI         32768
SF         499.8700157 MHz
WDW        EM
SSB        0
LB         0.30 Hz
GB         0
PC         1.00
  
```

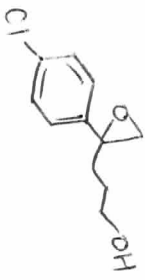

ppm

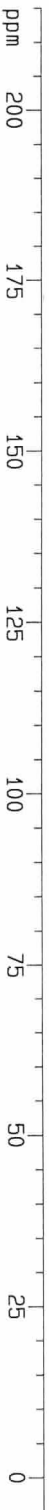

- 138.11
- 133.33
- 129.49
- 128.90
- 128.58
- 128.37
- 127.48
- 127.26
- 126.80
- 126.29
  
- 77.25
- 77.00
- 76.75
- 69.11
- 68.87
- 68.49
- 62.16
- 59.65
- 56.10
  
- 35.19
- 34.07
- 31.63
- 31.45
- 27.72
- 26.76
- 26.09

Current Data Parameters  
 NAME ZL7R318C169A  
 EXPNO 1  
 PROCNO 1

F2 - Acquisition Parameters  
 Date\_ 20100108  
 Time 22.41

INSTRUM spect  
 PROBHD 5 mm QNP 1H  
 PULPROG zgpg  
 TD 75184  
 SOLVENT CDCl3  
 NS 1862  
 DS 0  
 SWH 37593.984 Hz  
 FIDRES 0.500026 Hz  
 AQ 0.999972 sec  
 RG 8192  
 DE 13.300 usec  
 TE 300.0 K  
 D1 0.10000000 sec  
 d11 0.03000000 sec

==== CHANNEL f1 =====  
 NUC1 13C  
 P1 4.60 usec  
 PL1 0.00 dB  
 SF01 125.7690572 MHz

==== CHANNEL f2 =====  
 CPDPRG2 waltz16  
 NUC2 1H  
 P2 90.00 usec  
 PL2 120.00 dB  
 PL12 19.00 dB  
 SF02 500.1320005 MHz

F2 - Processing Parameters  
 SI 32768  
 SF 125.7577941 MHz  
 KDM EM  
 SSB 0  
 LB 1.00 Hz  
 GB 0  
 PC 1.40

1D NMR Plot parameters  
 CX 20.00 cm  
 F1P 215.000 ppm  
 F1 27037.93 Hz  
 F2P -5.000 ppm  
 F2 -628.79 Hz  
 PPKCM 11.00000 ppm/cm  
 HZCM 1383.33582 Hz/cm

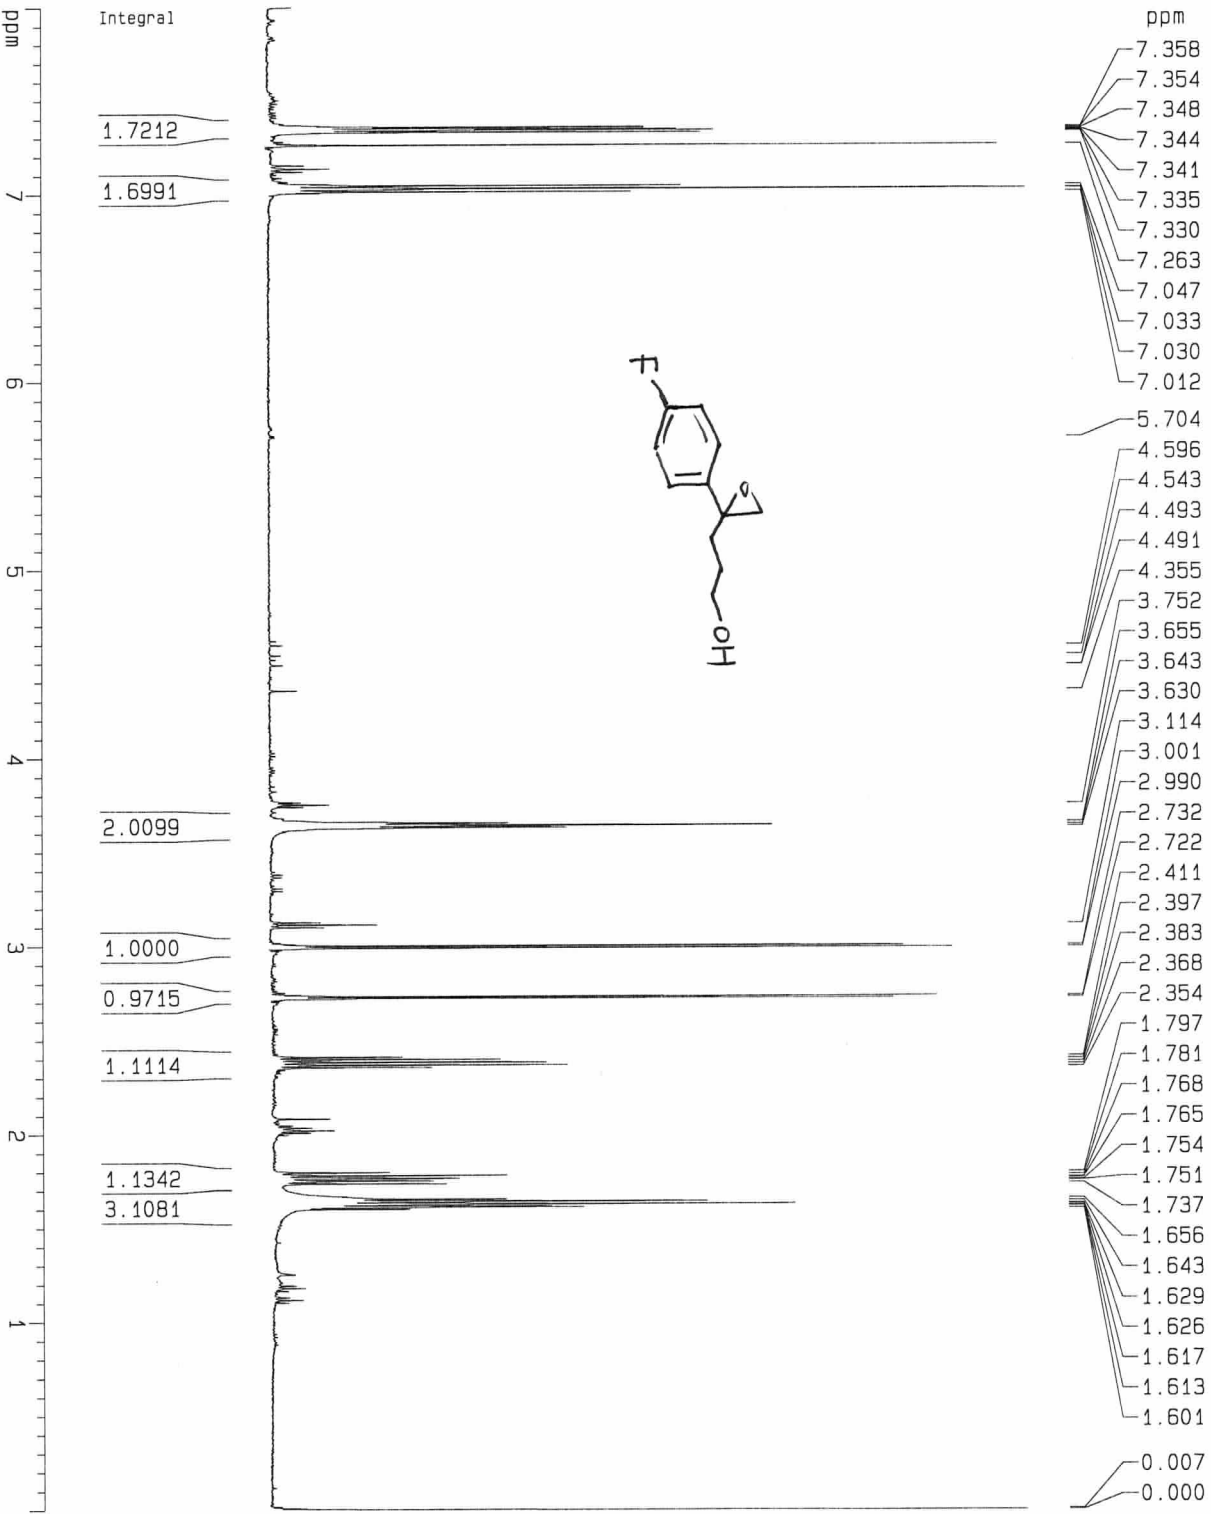

Current Data Parameters  
 NAME ZL7R317H189A  
 EXPNO 1  
 PROCNO 1

F2 - Acquisition Parameters  
 Date\_ 20100121  
 Time 21.48  
 INSTRUM spect  
 PROBHID 5 mm QNP 1H  
 PULPROG zg  
 TD 48076  
 SOLVENT CDCl3  
 NS 8  
 DS 0  
 SMH 8012.820 Hz  
 FIDRES 0.166670 Hz  
 AQ 2.9999924 sec  
 RG 256  
 DW 62.400 usec  
 DE 4.50 usec  
 TE 300.0 K  
 D1 3.00000000 sec

===== CHANNEL f1 =====  
 NUC1 1H  
 P1 9.00 usec  
 PL1 0.00 dB  
 SF01 500.1325006 MHz

F2 - Processing parameters  
 SI 65536  
 SF 500.1300124 MHz  
 WDW EM  
 SSB 0  
 LB 0.30 Hz  
 GB 0  
 PC 1.00

1D NMR plot parameters  
 CX 20.00 cm  
 F1P 8.000 ppm  
 F1 4001.04 Hz  
 F2P 0.000 ppm  
 F2 0.00 Hz  
 PPMCKM 0.40000 ppm/cm  
 HZCM 200.05200 Hz/cm

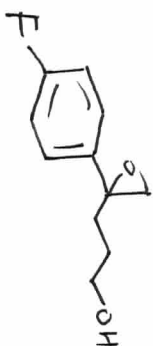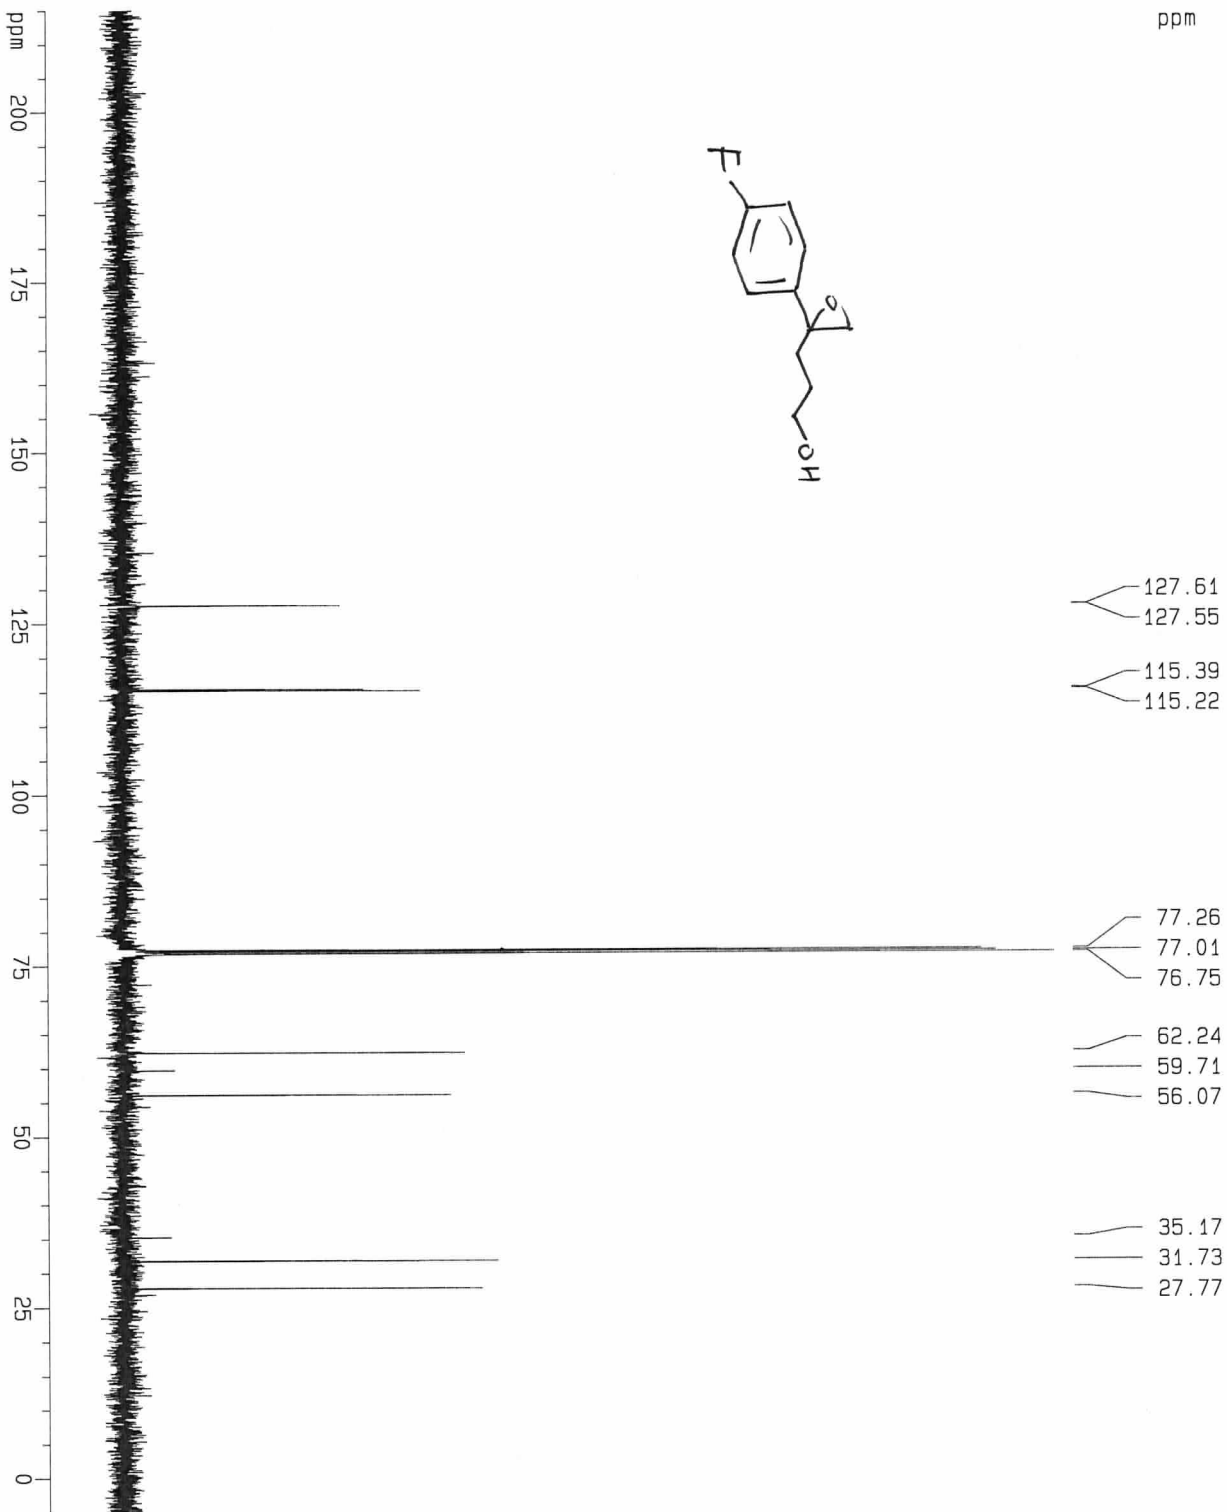

Current Data Parameters  
 NAME ZL7R317C189A  
 EXPNO 1  
 PROCNO 1

F2 - Acquisition Parameters

Date\_ 20100121  
 Time 22.09  
 INSTRUM spect  
 PROBHD 5 mm QNP 1H  
 PULPROG zgpg  
 TD 75184  
 SOLVENT CDCl3  
 NS 1024  
 DS 0  
 SMH 37593.984 Hz  
 FIDRES 0.500026 Hz  
 AQ 0.9999972 sec  
 RG 8192  
 DW 13.300 usec  
 DE 7.50 usec  
 TE 300.0 K  
 D1 0.10000000 sec  
 d11 0.03000000 sec

===== CHANNEL f1 =====

NUC1 13C  
 P1 4.60 usec  
 PL1 0.00 dB  
 SF01 125.7690572 MHz

===== CHANNEL f2 =====

CPDPRG2 waltz16  
 NUC2 1H  
 PCPD2 90.00 usec  
 PL2 120.00 dB  
 PL12 19.00 dB  
 SF02 500.1320005 MHz

F2 - Processing parameters

SI 32768  
 SF 125.7577918 MHz  
 WDW EM  
 SSB 0  
 LB 1.00 Hz  
 GB 0  
 PC 1.40

1D NMR plot parameters

CX 20.00 cm  
 F1P 215.000 ppm  
 F1 27037.93 Hz  
 F2P -5.000 ppm  
 F2 -628.79 Hz  
 PPMCK 11.00000 ppm/cm  
 HZCM 1383.33569 Hz/cm

ppm

- 7.937
- 7.933
- 7.924
- 7.920
- 7.475
- 7.471
- 7.461
- 7.458
- 7.251

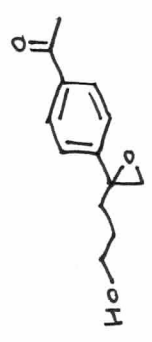

- 3.645
- 3.633
- 3.621
- 3.039
- 3.028
- 2.735
- 2.724
- 2.593
- 2.588
- 2.484
- 2.482
- 2.469
- 2.454
- 2.440
- 1.787
- 1.772
- 1.757
- 1.743
- 1.694
- 1.648
- 1.634
- 1.622
- 1.618
- 1.609
- 1.605

ppm

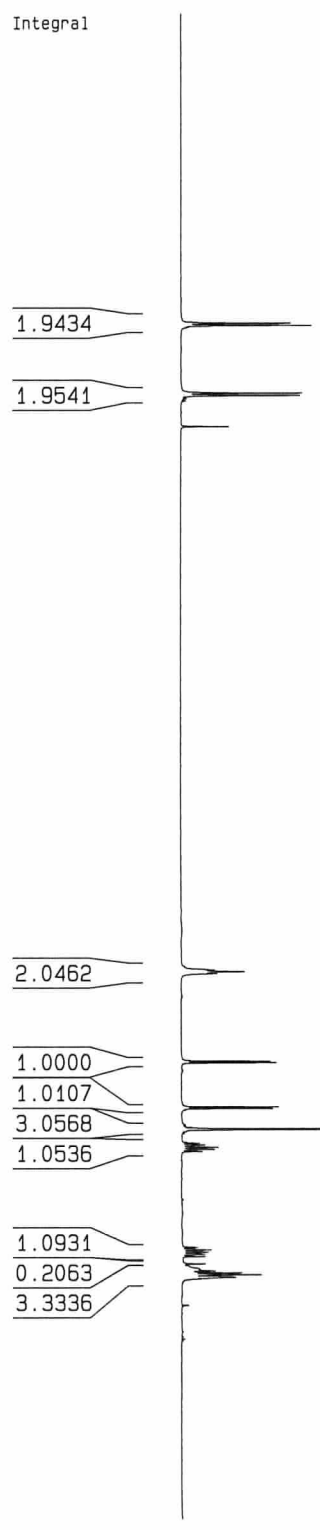

Current Data Parameters

NAME ZL7R348H249A  
 EXPNO 1  
 PROCNO 1

F2 - Acquisition Parameters

Date\_ 20100430  
 Time 16.30  
 INSTRUM spect  
 PROBHD 5 mm QNP 1H  
 PULPROG zg  
 TD 48076  
 SOLVENT CDCl3  
 NS 8  
 DS 0  
 SWH 8012.820 Hz  
 FIDRES 0.166670 Hz  
 AQ 2.9999924 sec  
 RG 128  
 DW 62.400 usec  
 DE 4.50 usec  
 TE 300.0 K  
 D1 3.00000000 sec

==== CHANNEL f1 =====

NUC1 1H  
 P1 9.00 usec  
 PL1 0.00 dB  
 SF01 500.1325006 MHz

F2 - Processing parameters

SI 65536  
 SF 500.1300181 MHz  
 KDM EM  
 SSB 0  
 LB 0.30 Hz  
 GB 0  
 PC 1.00

1D NMR plot parameters

CX 20.00 cm  
 F1P 10.000 ppm  
 F1 5001.30 Hz  
 F2P 0.000 ppm  
 F2 0.00 Hz  
 PPMCM 0.50000 ppm/cm  
 HZCM 250.06500 Hz/cm

ppm

ppm  
200  
175  
150  
125  
100  
75  
50  
25

197.62  
145.00  
136.37  
128.53  
126.04  
125.29  
77.25  
77.00  
76.75  
62.17  
59.86  
56.17  
31.28  
27.74  
26.61

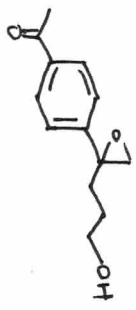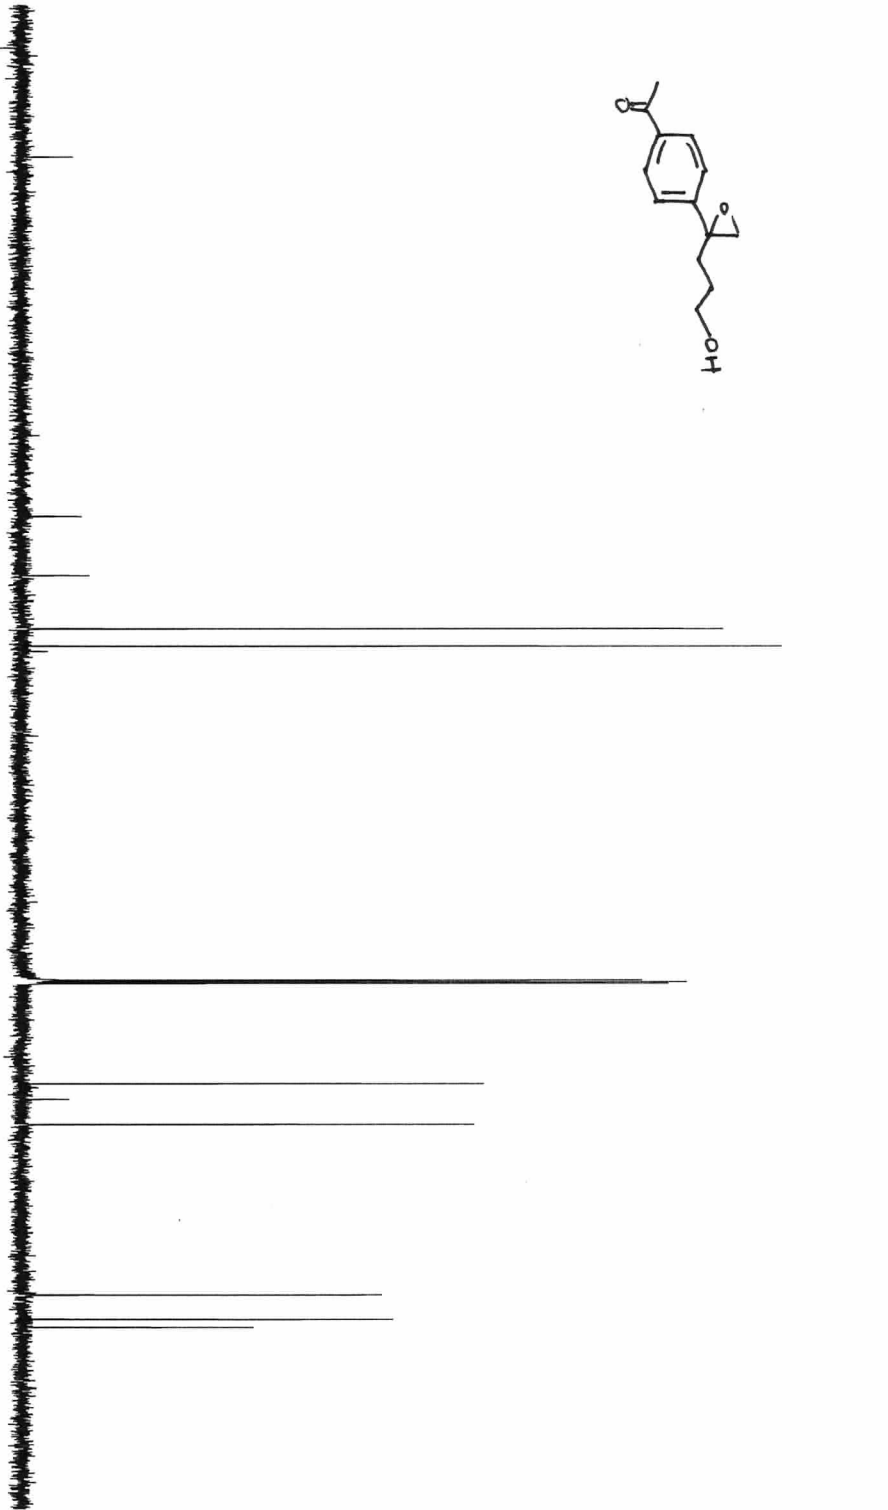

Current Data Parameters  
NAME ZL7R348C249A  
EXPNO 1  
PROCNO 1

F2 - Acquisition Parameters

Date\_ 20100430  
Time 16.58  
INSTRUM spect  
PROBHD 5 mm QNP 1H  
PULPROG zgpg  
TD 75184  
SOLVENT C6D6  
NS 1318  
DS 0  
SWH 37593.984 Hz  
FIDRES 0.500026 Hz  
AQ 0.9999972 sec  
RG 4096  
DM 13.300 usec  
DE 7.50 usec  
TE 300.0 K  
D1 0.10000000 sec  
d11 0.03000000 sec

==== CHANNEL f1 =====  
NUC1 13C

P1 4.60 usec  
PL1 0.00 dB  
SF01 125.7690572 MHz

==== CHANNEL f2 =====  
CPDPRG2 waltz16

NUC2 1H  
PCPD2 90.00 usec  
PL2 120.00 dB  
PL12 19.00 dB  
SF02 500.1320005 MHz

F2 - Processing Parameters

SI 32768  
SF 125.7577918 MHz  
WDW EM  
SSB 0  
LB 1.00 Hz  
GB 0  
PC 1.40

1D NMR plot parameters

CX 20.00 cm  
F1P 220.000 ppm  
F1 27666.71 Hz  
F2P 0.000 ppm  
F2 0.00 Hz  
PPMCM 11.00000 ppm/cm  
HZCM 1383.33569 Hz/cm

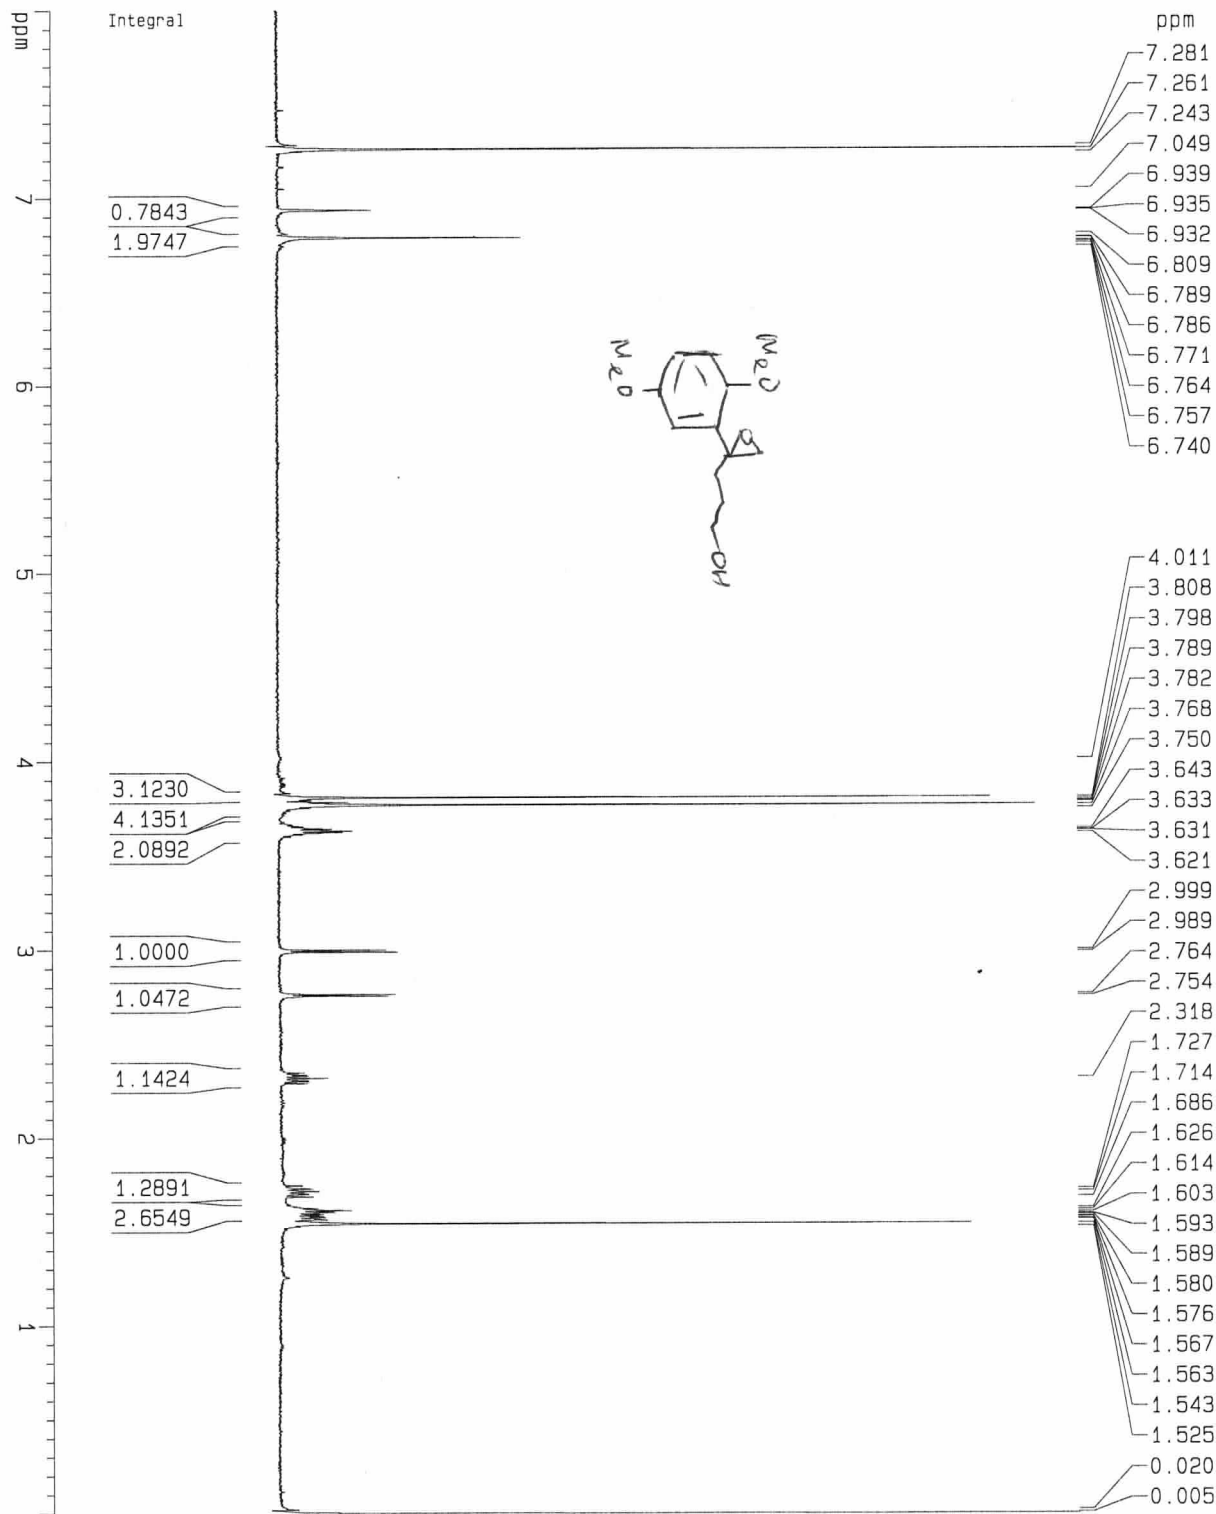

Current Data Parameters  
 NAME ZL7R320H175A  
 EXPNO 1  
 PROCNO 1

F2 - Acquisition Parameters  
 Date\_ 20100201  
 Time 19.18

INSTRUM spect  
 PROBHD 5 mm GNP 1H  
 PULPROG zg  
 TD 48076  
 SOLVENT CDCl3  
 NS 20  
 DS 0

SWH 8012.820 Hz  
 FIDRES 0.166670 Hz  
 AQ 2.9999924 sec  
 RG 512  
 DW 62.400 usec  
 DE 4.50 usec  
 TE 300.0 K

D1 3.00000000 sec

==== CHANNEL f1 =====  
 NUC1 1H  
 P1 9.00 usec  
 PL1 0.00 dB  
 SF01 500.1325006 MHz

F2 - Processing parameters  
 SI 65536  
 SF 500.1300133 MHz  
 KWDM EM  
 SSB 0  
 LB 0.30 Hz  
 GB 0  
 PC 1.00

1D NMR plot parameters  
 CX 20.00 cm  
 F1P 8.000 ppm  
 F1 4001.04 Hz  
 F2P 0.000 ppm  
 F2 0.00 Hz  
 PPMCM 0.40000 ppm/cm  
 HZCM 200.05200 Hz/cm



ppm

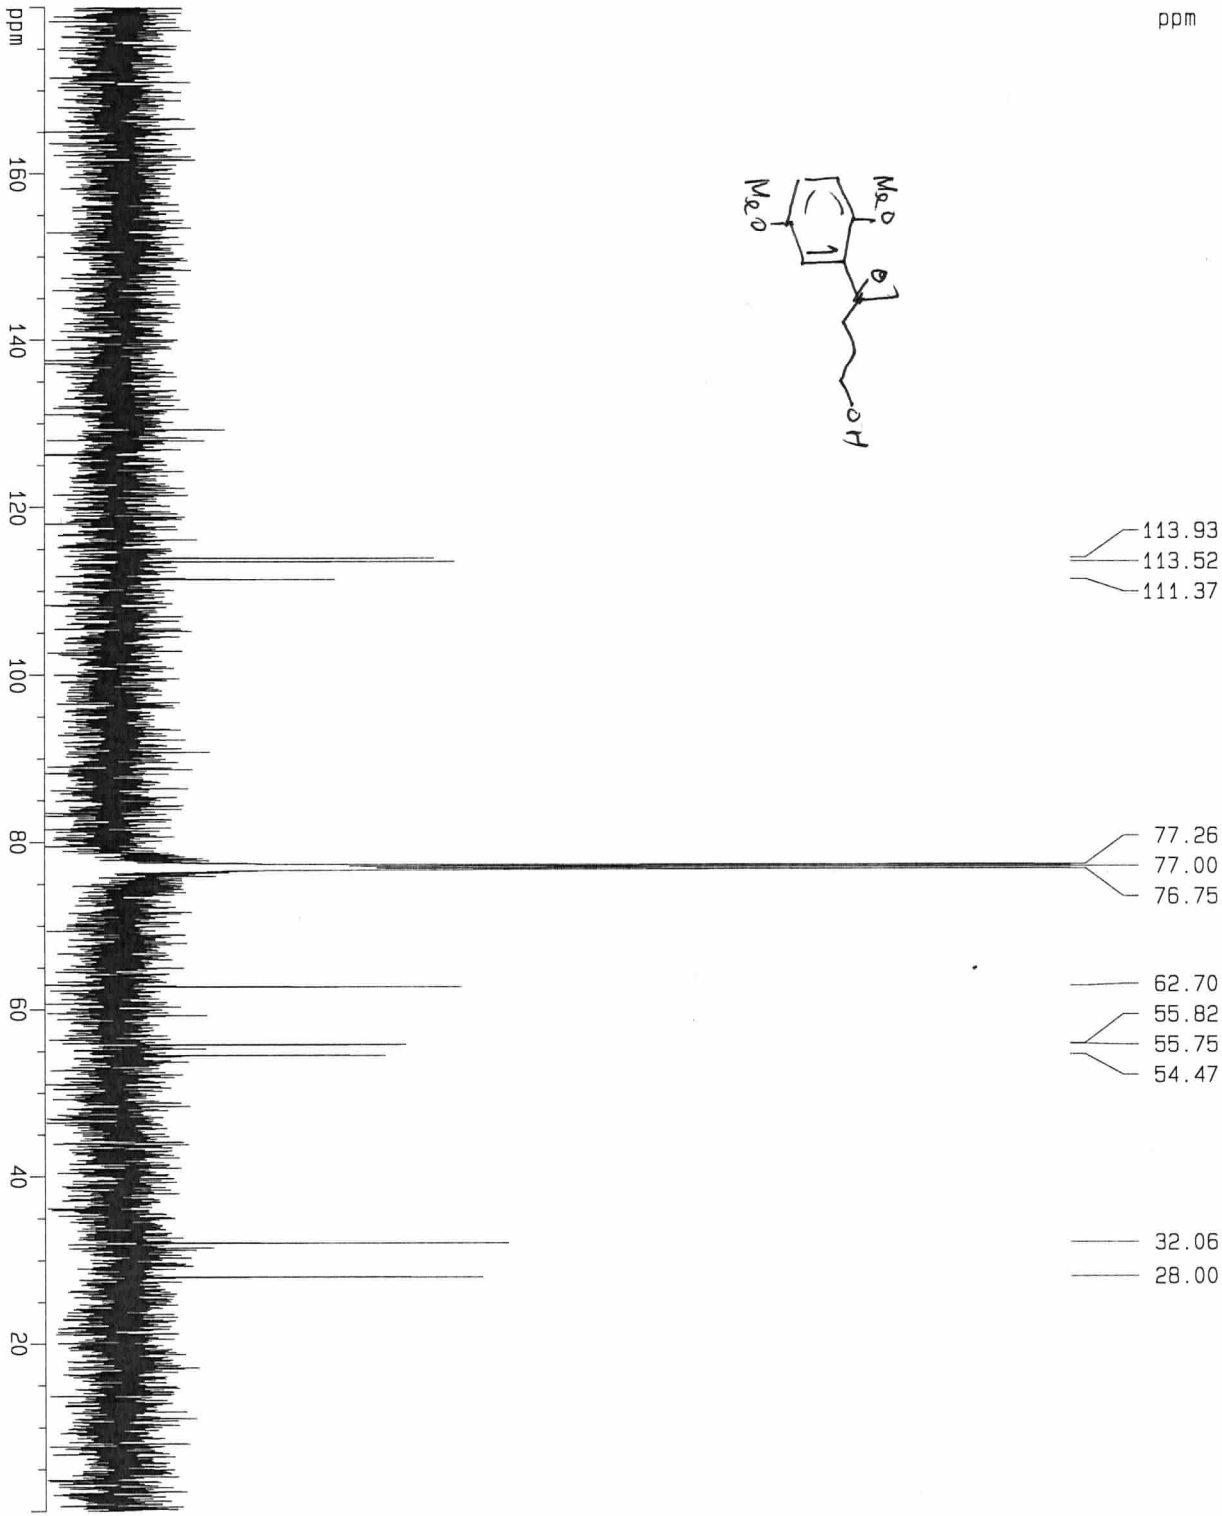

Current Data Parameters  
 NAME ZL7R320C175A  
 EXPNO 1  
 PROCNO 1

F2 - Acquisition Parameters

Date\_ 20100201  
 Time 22.22  
 INSTRUM spect  
 PROBHID 5 mm QNP 1H  
 PULPROG zgpg30  
 TD 75184  
 SOLVENT C6D6  
 NS 6269  
 DS 0  
 SMH 37593.984 Hz  
 FIDRES 0.500025 Hz  
 AQ 0.9999972 sec  
 RG 8192  
 DW 13.300 usec  
 DE 7.50 usec  
 TE 300.0 K  
 D1 0.10000000 sec  
 D11 0.03000000 sec

===== CHANNEL f1 =====

NUC1 13C  
 P1 4.60 usec  
 PL1 0.00 dB  
 SF01 125.7690572 MHz

===== CHANNEL f2 =====

CPDPRG2 waltz16  
 NUC2 1H  
 PCPD2 90.00 usec  
 PL2 120.00 dB  
 PL12 19.00 dB  
 SF02 500.1320005 MHz

F2 - Processing parameters

SI 32768  
 SF 125.7577906 MHz  
 KDM EM  
 SSB 0  
 LB 4.00 Hz  
 GB 0  
 PC 1.40

1D NMR plot parameters

CX 20.00 cm  
 F1P 180.000 ppm  
 F1 22636.40 Hz  
 F2P 0.000 ppm  
 F2 0.00 Hz  
 PPMCM 9.00000 ppm/cm  
 HZCM 1131.82007 Hz/cm

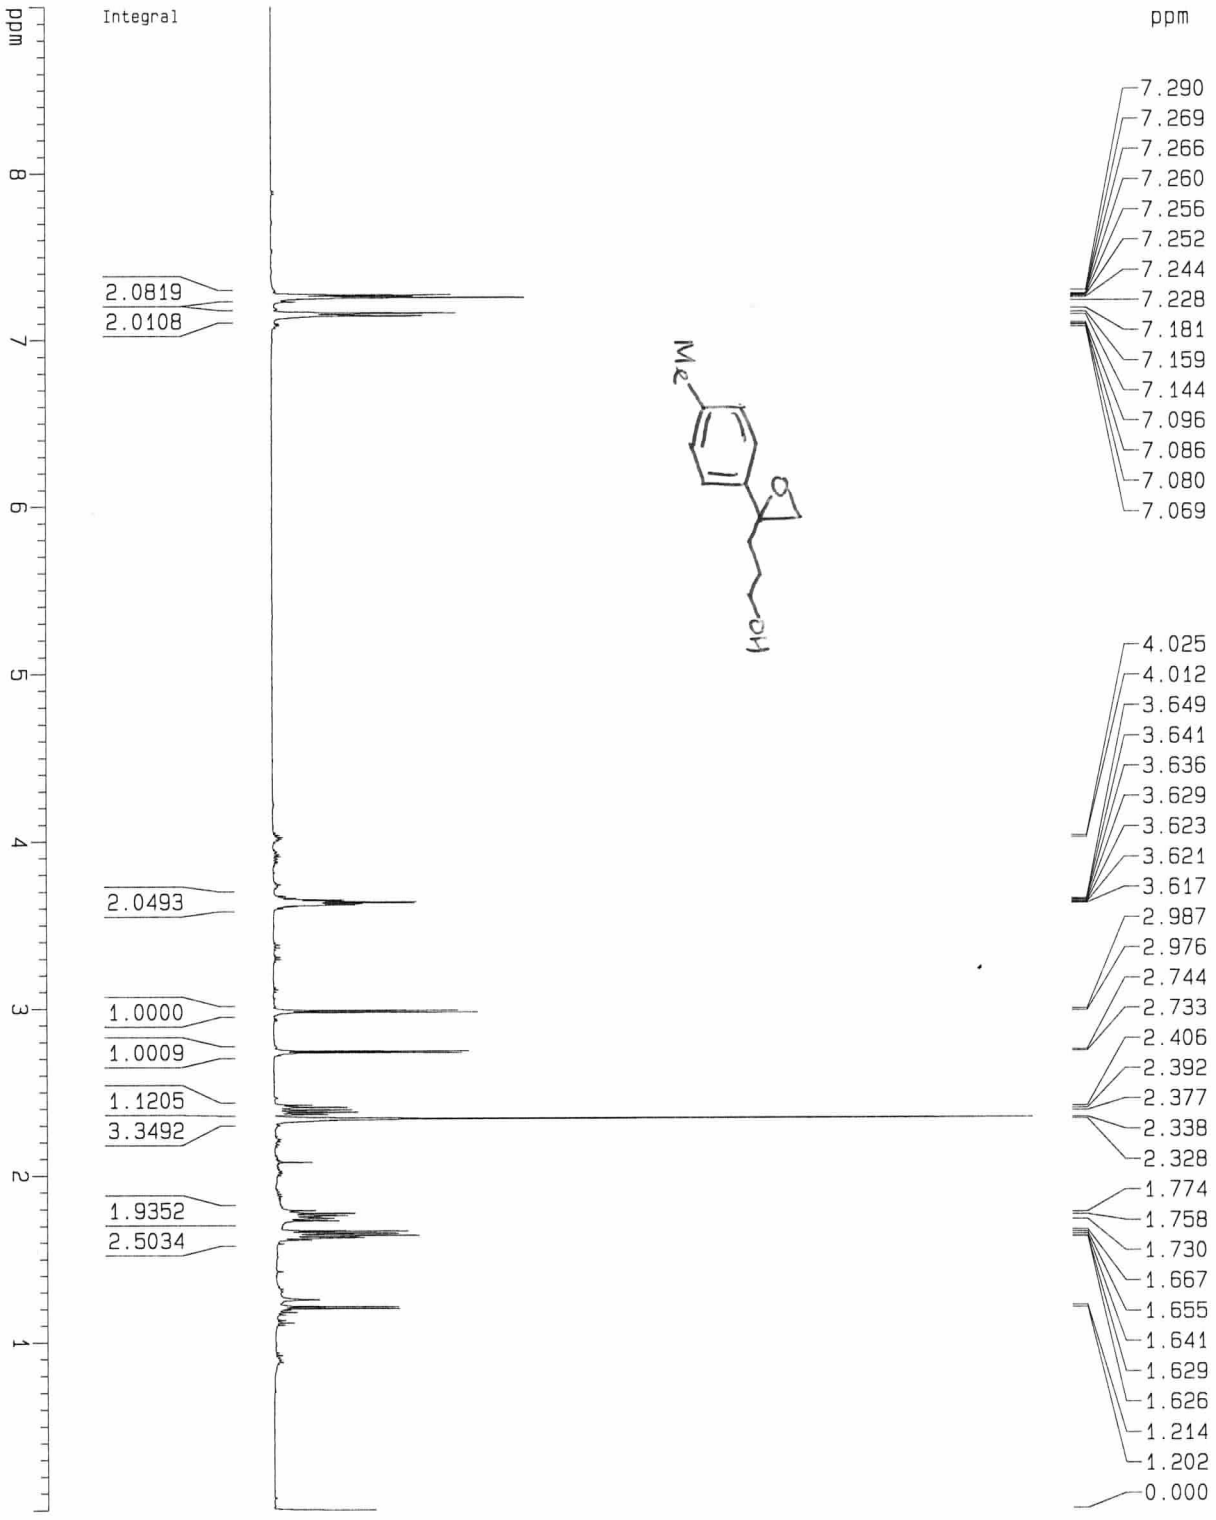

Current Data Parameters  
 NAME ZL7R319H185A2  
 EXPNO 1  
 PROCNO 1

F2 - Acquisition Parameters  
 Date\_ 20100201  
 Time 19.08

INSTRUM spect  
 PROBHD 5 mm QNP 1H  
 PULPROG zg  
 TD 48076  
 SOLVENT CDCl3  
 NS 4  
 DS 0

SMH 8012.820 Hz  
 FIDRES 0.156670 Hz  
 AQ 2.9999924 sec  
 RG 128  
 DW 62.400 usec  
 DE 4.50 usec  
 TE 300.0 K  
 D1 3.00000000 sec

==== CHANNEL f1 =====  
 NUCL1 1H  
 P1 9.00 usec  
 PL1 0.00 dB  
 SF01 500.1325006 MHz

F2 - Processing parameters  
 SI 65536  
 SF 500.1300133 MHz  
 WDM EM  
 SSB 0  
 LB 0.30 Hz  
 GB 0  
 PC 1.00

1D NMR plot parameters  
 CX 20.00 cm  
 F1P 9.000 ppm  
 F1 4504.17 Hz  
 F2P 0.000 ppm  
 F2 0.000 Hz  
 PPMCM 0.45000 ppm/cm  
 HZCM 225.05850 Hz/cm

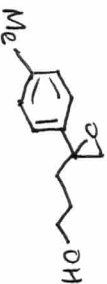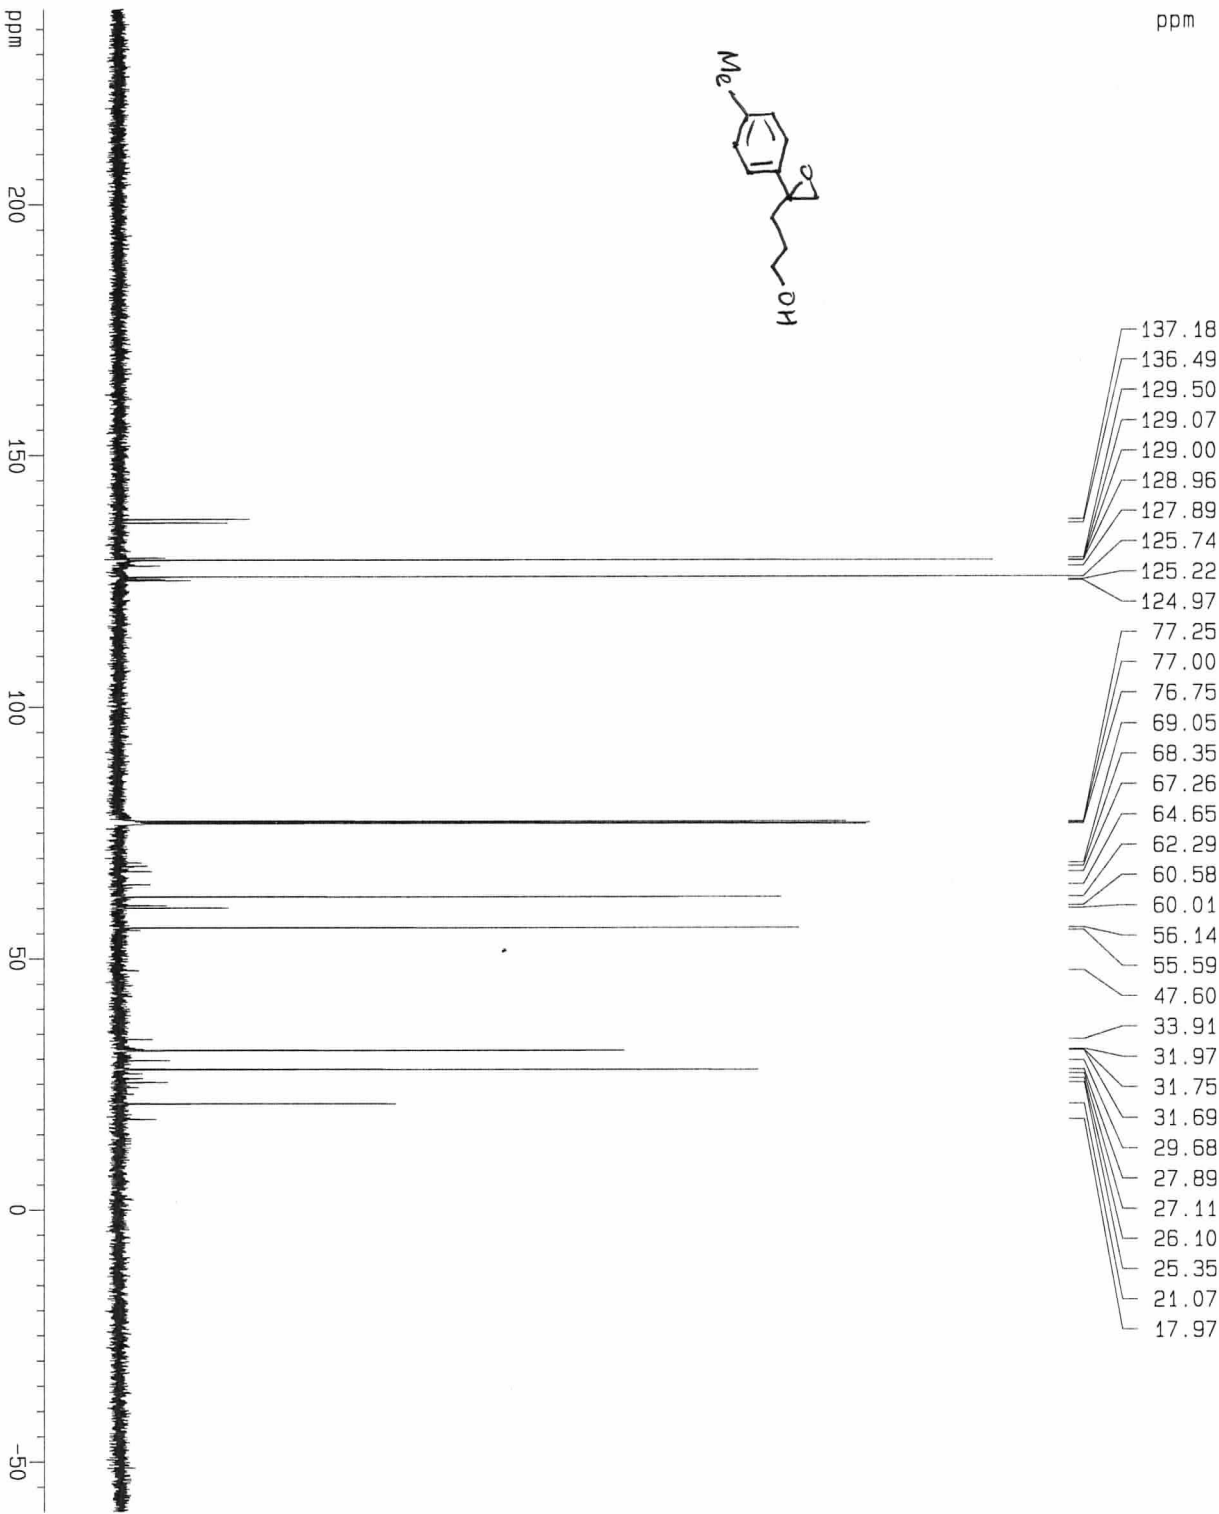

ppm

- 137.18
- 136.49
- 129.50
- 129.07
- 129.00
- 128.96
- 127.89
- 125.74
- 125.22
- 124.97
- 77.25
- 77.00
- 76.75
- 69.05
- 68.35
- 67.26
- 64.65
- 62.29
- 60.58
- 60.01
- 56.14
- 55.59
- 47.60
- 33.91
- 31.97
- 31.75
- 31.69
- 29.68
- 27.89
- 27.11
- 26.10
- 25.35
- 21.07
- 17.97

Current Data Parameters

NAME ZLR319C185A

EXEND 1

PROCNO 1

F2 - Acquisition Parameters

Date\_ 20100201

Time 20.48

INSTRUM spect

PROBHD 5 mm QNP 1H

PULPROG zgpg

TD 75184

SOLVENT C6D6

NS 2048

DS 0

SMH 37593.984 Hz

FIDRES 0.500026 Hz

AQ 0.999972 sec

RG 8192

DW 13.300 usec

DE 7.50 usec

TE 300.0 K

D1 0.1000000 sec

d11 0.03000000 sec

CHANNEL f1

NUC1 13C

P1 4.60 usec

PL1 0.00 dB

SFO1 125.7690572 MHz

CHANNEL f2

CPDPRG2 waltz16

NUC2 1H

PCPD2 90.00 usec

PL2 120.00 dB

PL12 19.00 dB

SFO2 500.1320005 MHz

F2 - Processing parameters

SI 32768

SF 125.7577929 MHz

WDW EM

SSB 0

LB 1.00 Hz

GB 0

PC 1.40

1D NMR plot parameters

CX 20.00 cm

F1P 238.970 ppm

F1 30052.33 Hz

F2P -59.970 ppm

F2 -7541.65 Hz

PPMCM 14.94698 ppm/cm

HZCM 1879.69897 Hz/cm

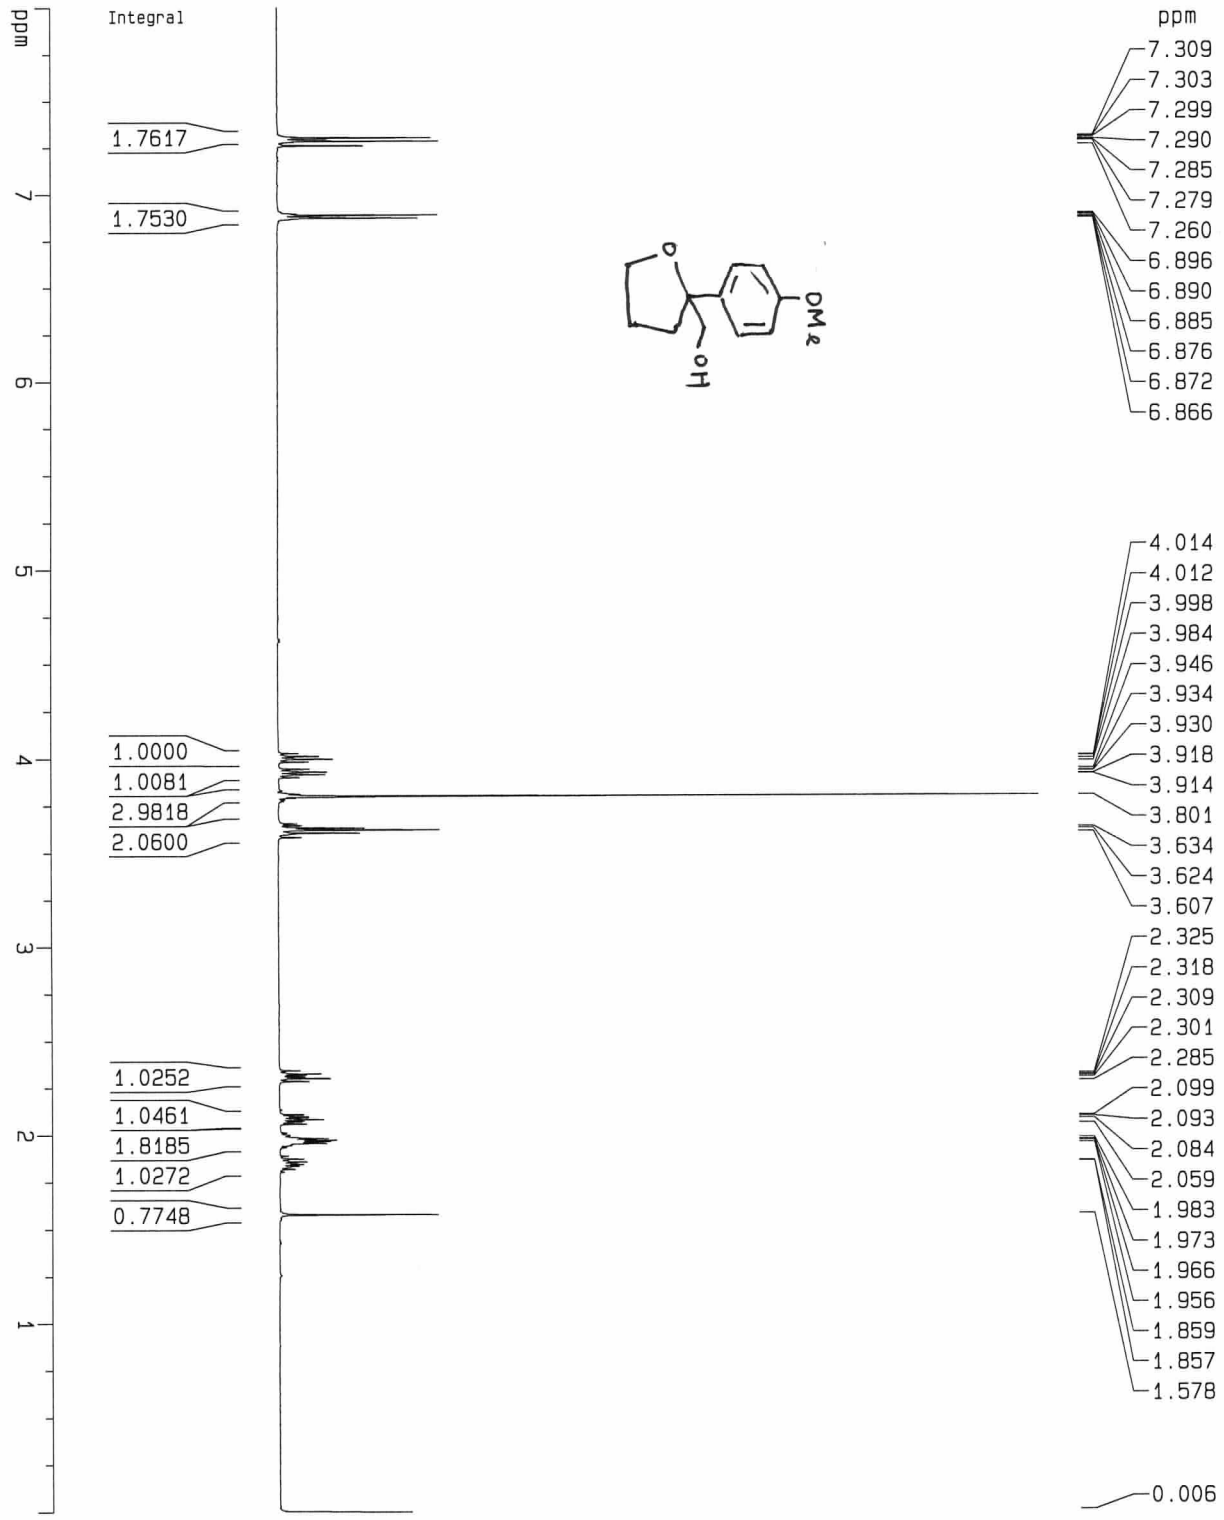

Current Data Parameters  
 NAME ZL7R322H192A2  
 EXPNO 1  
 PROCNO 1

F2 - Acquisition Parameters  
 Date\_ 20100430  
 Time 20.05  
 INSTRUM spect  
 PULPROG 5 mm QNP 1H  
 TD 48076  
 SOLVENT CDCl3  
 NS 8  
 DS 0  
 SWH 8012.820 Hz  
 FIDRES 0.166670 Hz  
 AQ 2.9999924 sec  
 RG 256  
 DW 62.400 usec  
 DE 4.50 usec  
 TE 300.0 K  
 D1 3.00000000 sec

==== CHANNEL f1 =====  
 NUC1 1H  
 P1 9.00 usec  
 PL1 0.00 dB  
 SF01 500.1325006 MHz

F2 - Processing parameters  
 SI 65536  
 SF 500.1300131 MHz  
 WDW EM  
 SSB 0  
 LB 0.30 Hz  
 GB 0  
 PC 1.00

1D NMR plot parameters  
 CX 20.00 cm  
 F1P 8.000 ppm  
 F1 4001.04 Hz  
 F2P 0.000 ppm  
 F2 0.00 Hz  
 PPMCM 0.40000 ppm/cm  
 HZCM 200.05200 Hz/cm

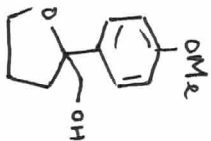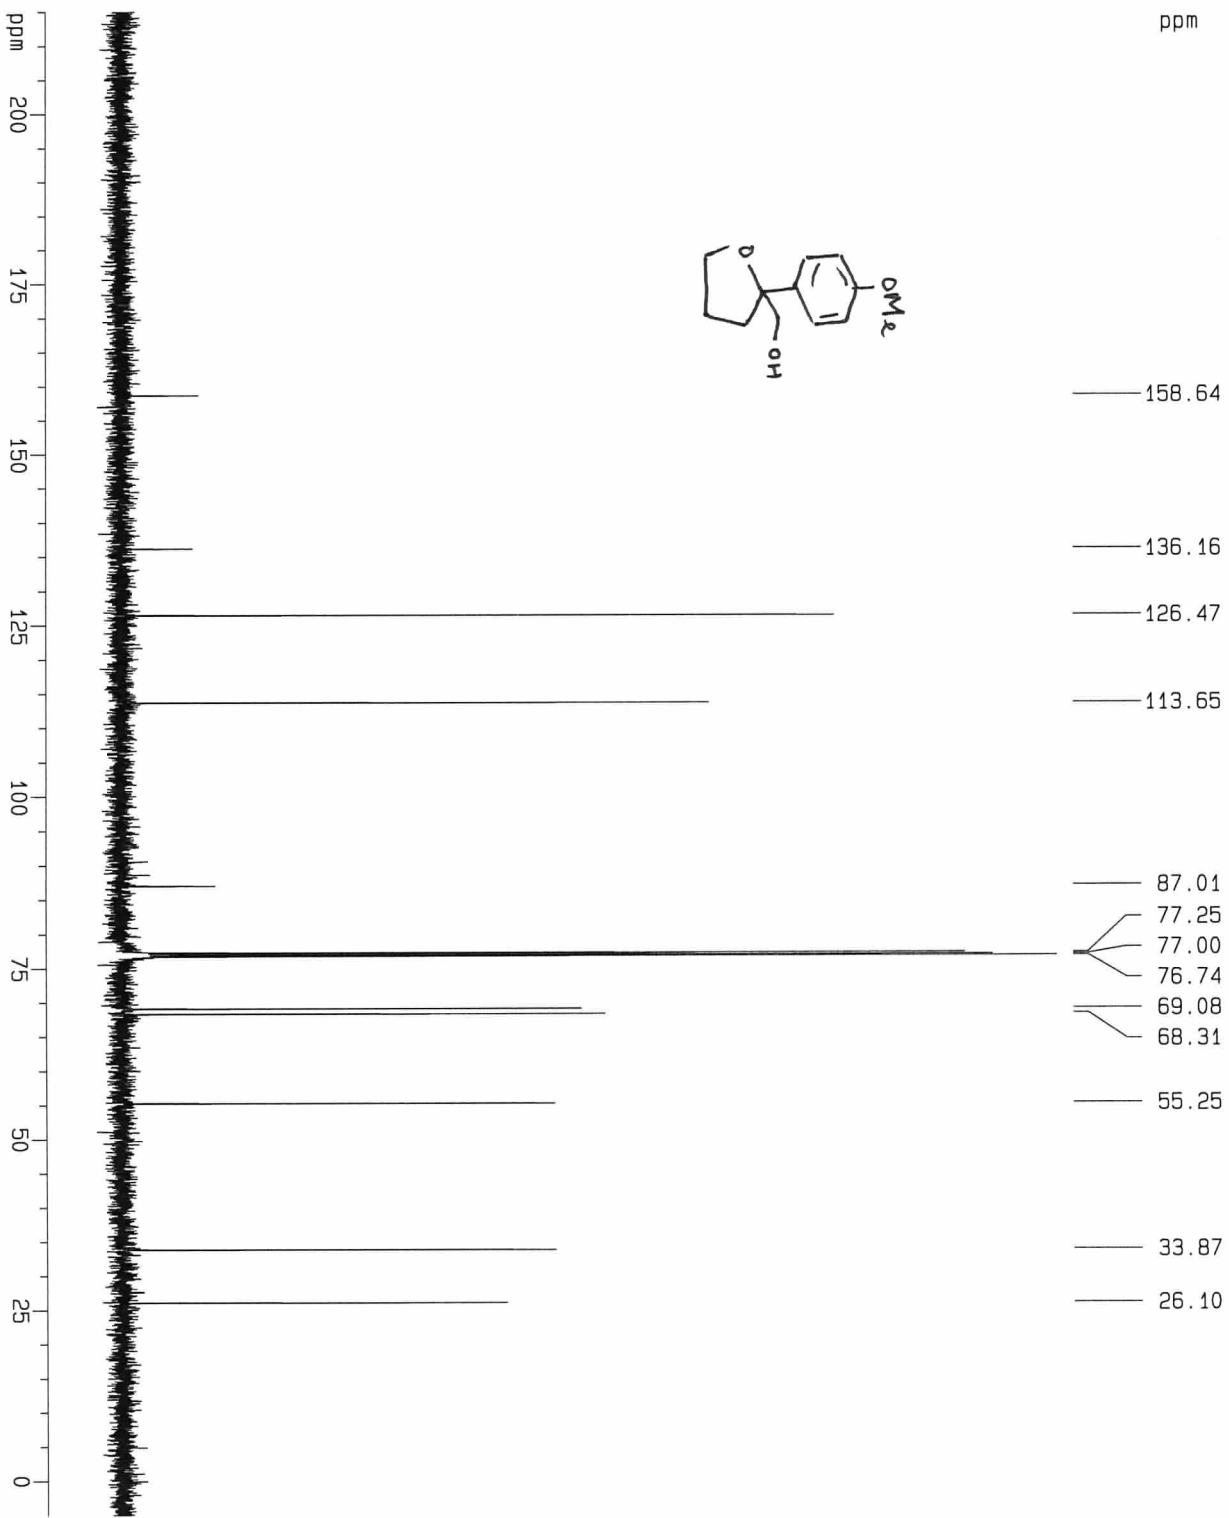

Current Data Parameters  
 NAME ZL7R32C192A2  
 EXPNO 1  
 PROCNO 1

F2 - Acquisition Parameters

Date\_ 20100430  
 Time 20.13  
 INSTRUM spect  
 PROBHID 5 mm QNP 1H  
 PULPROG zgpg  
 TD 75184  
 SOLVENT C6D6  
 NS 1508  
 DS 0  
 SMH 37593.984 Hz  
 FIDRES 0.500026 Hz  
 AQ 0.9999972 sec  
 RG 8192  
 DW 13.300 usec  
 DE 7.50 usec  
 TE 300.0 K  
 D1 0.10000000 sec  
 D11 0.03000000 sec

===== CHANNEL f1 =====

NUC1 13C  
 P1 4.60 usec  
 PL1 0.00 dB  
 SF01 125.7690572 MHz

===== CHANNEL f2 =====

CPDPRG2 wa1tz16  
 NUC2 1H  
 PCPD2 90.00 usec  
 PL2 120.00 dB  
 PL12 19.00 dB  
 SF02 500.1320005 MHz

F2 - Processing parameters

SI 32768  
 SF 125.7577918 MHz  
 KDW EM  
 SSB 0  
 LB 1.00 Hz  
 GB 0  
 PC 1.40

1D NMR plot parameters

CX 20.00 cm  
 FAP 215.000 ppm  
 F1 27037.93 Hz  
 F2P -5.000 ppm  
 F2 -628.79 Hz  
 PPMCM 11.00000 ppm/cm  
 HZCM 1383.33569 Hz/cm

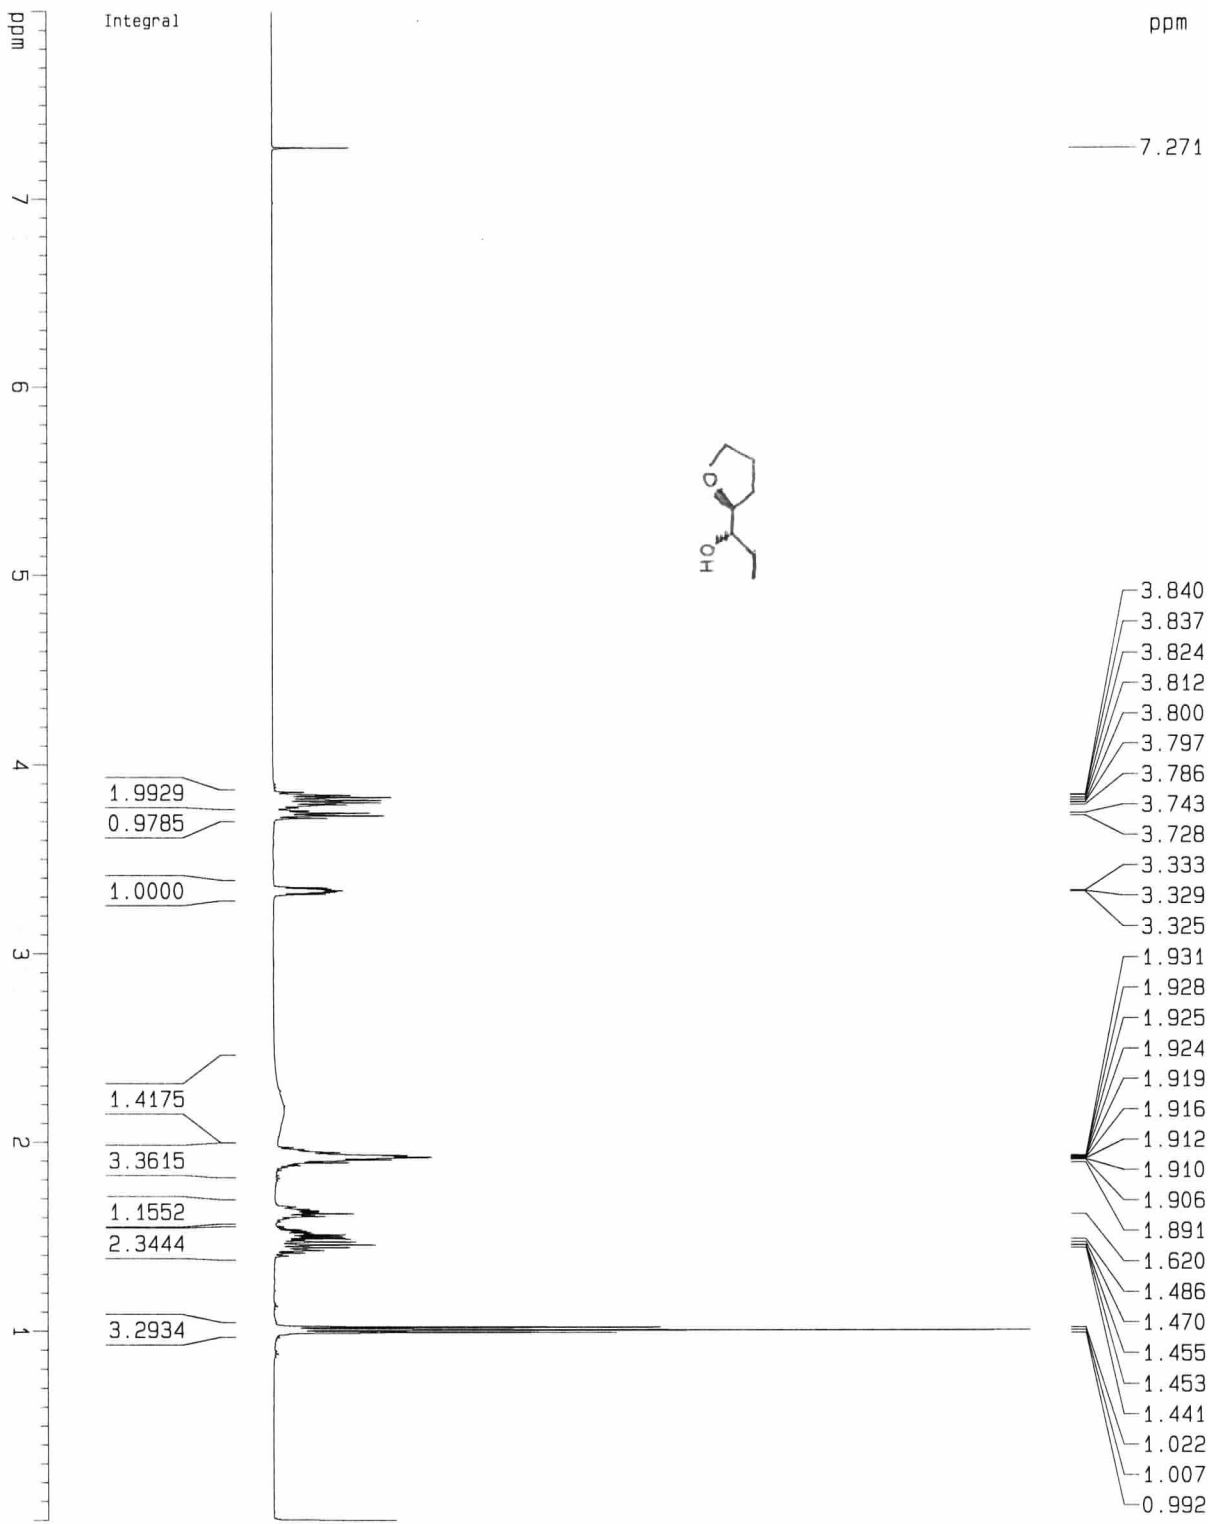

Current Data Parameters  
 NAME ZL4R20H220A  
 EXPNO 1  
 PROCNO 1

F2 - Acquisition Parameters  
 Date\_ 20080727  
 Time 16.35  
 INSTRUM spect  
 PROBHD 5 mm QNP 1H  
 PULPROG zg  
 TD 48076  
 SOLVENT CDC13  
 NS 8  
 DS 0  
 SMH 8012.820 Hz  
 FIDRES 0.166670 Hz  
 AQ 2.9999924 sec  
 RG 64  
 DW 62.400 usec  
 DE 4.50 usec  
 TE 300.0 K  
 D1 3.00000000 sec

==== CHANNEL f1 =====  
 NUC1 1H  
 P1 9.50 usec  
 PL1 0.00 dB  
 SF01 500.1325006 MHz

F2 - Processing parameters  
 SI 65536  
 SF 500.1300086 MHz  
 WDW EM  
 SSB 0  
 LB 0.30 Hz  
 GB 0  
 PC 1.00

1D NMR plot parameters  
 CX 20.00 cm  
 F1P 8.000 ppm  
 F1 4001.04 Hz  
 F2P 0.000 ppm  
 F2 0.00 Hz  
 PPMCM 0.40000 ppm/cm  
 HZCM 200.05200 Hz/cm
